# Supplementary material
Source: HighWire-hosted journal article supplement (http://bmjleader.bmj.com/highwire/filestream/1410/field_highwire_adjunct_files/0/leader-2020-000360supp001_data_supplement.pdf)
Supplement: leader-2020-000360supp001_data_supplement.pdf [file leader-2020-000360supp001_data_supplement.pdf]

| Source (First Author, Year)                | Setting                                            | Learner Number | Learner Type                                                                | Intervention Length        | Intervention Description                                                                                                                                   | Teaching Methods                                                                                                                                                                                                                                                                                                                                                                                                                   | Educational Content                                                                                                                                                                                                                                                                                             | Main findings by Kirkpatrick level                                                                                                                                                                                                                                                                                                                                                                                                                                                                                                                                                                                                                                                          | JBI Score | MERSQI Score |
|--------------------------------------------|----------------------------------------------------|----------------|-----------------------------------------------------------------------------|----------------------------|------------------------------------------------------------------------------------------------------------------------------------------------------------|------------------------------------------------------------------------------------------------------------------------------------------------------------------------------------------------------------------------------------------------------------------------------------------------------------------------------------------------------------------------------------------------------------------------------------|-----------------------------------------------------------------------------------------------------------------------------------------------------------------------------------------------------------------------------------------------------------------------------------------------------------------|---------------------------------------------------------------------------------------------------------------------------------------------------------------------------------------------------------------------------------------------------------------------------------------------------------------------------------------------------------------------------------------------------------------------------------------------------------------------------------------------------------------------------------------------------------------------------------------------------------------------------------------------------------------------------------------------|-----------|--------------|
| <b>Higher Reliability Studies (MERSQI)</b> |                                                    |                |                                                                             |                            |                                                                                                                                                            |                                                                                                                                                                                                                                                                                                                                                                                                                                    |                                                                                                                                                                                                                                                                                                                 |                                                                                                                                                                                                                                                                                                                                                                                                                                                                                                                                                                                                                                                                                             |           |              |
| Boyle, 2004 [1]                            | Two US ICUs                                        | 10             | 3 Physicians<br>7 Nurses                                                    | 8 months                   | 6 externally provided modules, total 23.5hrs                                                                                                               | Learning activities, small group skill practice, problem-solving sessions, feedback and reinforcement of skills, assignment, assessments, feedback                                                                                                                                                                                                                                                                                 | Leadership, communication, coordination, problem solving/conflict management, and team culture                                                                                                                                                                                                                  | 3a. Leaders reported increased satisfaction with their own communication and leadership skills<br>3b. Communication skills of ICU nurse and physician leaders improved significantly in simulation (from 57 to 75/100). Relationship skills remained high (77-78/100).<br>4b. Reported increased problem-solving between groups and decreased personal stress in one of the sites.                                                                                                                                                                                                                                                                                                          | n/a       | 16           |
| Parsons, 2018 [2]                          | Single US hospital residency                       | 14             | Residents (Emergency Medicine)                                              | 4 days                     | 4 days of simulation scenarios                                                                                                                             | Introductory didactic presentation followed by a series of 6 simulation scenarios and structured debriefs.                                                                                                                                                                                                                                                                                                                         | Crew Resource Management (CRM)                                                                                                                                                                                                                                                                                  | 2b. Each team showed an overall gradual improvement in CRM skills compared to the preceding teams, suggesting that observational learning of CRM was effective in this setting.<br>3b. Large but not significant increases in all objective measures of leadership, problem solving, situational awareness, resource utilisation, communication, and overall crisis resource management score (overall 2.75/7 to overall 6.0/7). Very low number of teams (4) caused lack of significance (4)                                                                                                                                                                                               | n/a       | 14.5         |
| Cooper, 2001 [3]                           | UK advanced life support course                    | 35             | Mixed seniority doctors, nurses and technicians                             | 3 day resuscitation course | 75-min leadership development seminar                                                                                                                      | Lectures, videos and discussion groups, home reading                                                                                                                                                                                                                                                                                                                                                                               | Importance of leadership, behaviours of effective leadership, introversion/extroversion                                                                                                                                                                                                                         | 1. Appraisal of the leadership seminar was very positive (mean 4/5)<br>2a. Reported increased confidence in role as a leader<br>3b. Significant improvement over the control group 9/10 items on the leadership observation. Mean increase of 4.53/40 (cf. 2.23 in the control group)                                                                                                                                                                                                                                                                                                                                                                                                       | 6         | 14           |
| Malling, 2009 [4]                          | Single educational region in Denmark               | 28             | Consultants (Responsible for education)                                     | 6 months                   | Two three-day residential modules and a follow-up day.                                                                                                     | Residential modules and followup day. Mandatory assignments.                                                                                                                                                                                                                                                                                                                                                                       | Pedagogical knowledge, organization of specialist training, educational culture evaluation and quality assurance, planning specialist training in the department, supervision of supervisors, implementation strategies, personal development, leadership in specialist training, research in medical education | 1. Participants rated the course as beneficial and meeting their expectations (3.2-3.3/4)<br>2b. Technical, administrative and human skills feedback did not improve or differ from the control group.<br>3b. Citizenship behaviours did not improve or differ from the control group                                                                                                                                                                                                                                                                                                                                                                                                       | n/a       | 14           |
| von Vultée, 2004 [5]                       | University hospitals in Sweden                     | 52             | Specialists, senior physicians, heads of departments                        | 1 year                     | Three programs, including mentor programs, management networks, and lectures held across 1 year; no details on number, duration, or allocation to programs | Mentoring/Networking/Lectures                                                                                                                                                                                                                                                                                                                                                                                                      | NR                                                                                                                                                                                                                                                                                                              | 2a. No significant differences in self-reported well-being, self-esteem, mental energy, influence, authority, efficiency, assessed using elements of the quality, work, competence tool (data not provided)<br>2b. No significant differences in self-reported skills development, self-esteem, mental energy or work-related exhaustion<br>3a. No significant differences in influence, authority, participation, feedback, goal clarity or efficiency<br>3b. No significant difference in senior management positions between program and control<br>4b. Sick leave increased by 6.9 days per year fewer in intervention group compared to reference group (1.3 days vs 8.2 days), p<0.05 | n/a       | 14           |
| Fassiotto, 2018 [6]                        | Single US hospital                                 | 131            | Assistant/associate/full professors                                         | 9 months                   | 6 x 1.5 day sessions over 9 months                                                                                                                         | Interactive teaching methods based on adult learning principles, action learning projects                                                                                                                                                                                                                                                                                                                                          | Personal development as a leader managing people and relationships managing groups and projects managerial finance and accounting understanding the organizational system                                                                                                                                       | 1. Positive qualitative feedback about the course<br>2a. Increased perceived institutional support (no Bonferroni)<br>2b. Self-reported increased understanding of organisational structure esp. Finance<br>3b. Participants more likely to hold regional or national leadership titles and to have taken on new leadership titles. No significant difference in promotions<br>4b. Increased retention of female participants                                                                                                                                                                                                                                                               | 3         | 13.5         |
| Levine, 2008 [7]                           | Single US academic medical centre                  | 47             | Residents (Chief residents, medicine and surgery)                           | 1 year                     | Two-day offsite immersion training, project work                                                                                                           | Small-group discussions, evidence-based mini-lectures, interactive seminars, one-on-one project mentoring                                                                                                                                                                                                                                                                                                                          | Management of complex older patients, geriatric principles, giving feedback, approaching the reluctant learner, conflict resolution                                                                                                                                                                             | 1. Effectiveness of programme rated at 3.69/5<br>2b. Reported increased confidence in skills and knowledge in role of chief resident. Knowledge test significantly increased in 2 of 3 years. Significantly increased self-assessed knowledge<br>3a. Reports of heightened sensitivity to the unique needs of older patients<br>3b. Eight individuals accomplished 100% of their projects, 20/27 completed at least half of the project.                                                                                                                                                                                                                                                    | 0         | 13.5         |
| Hopkins, 2018 [8]                          | Single US hospital network                         | 113            | Senior medical leaders and academic faculty, 19 administrators, 94 doctors. | 9 months                   | Six 1.5 day sessions spaced over 9 months                                                                                                                  | Baseline assessments of their leadership competence, Multi-Source Feedback, Myers Briggs Type Indicator and the Thomas-Kilmann Conflict Mode Instrument. Reading materials, assignments, case study, role-play, discussions in dyads, brief reflection and writing assignments, responses to video vignettes, brainstorming, and small group problem-solving assignments, with minimal emphasis on didactic lectures. Project work | Personal development as a leader Managing people and relationships Managing groups and projects Managerial finance and accounting Understanding the organizational system                                                                                                                                       | 1. Programme rated 4.5/5 overall<br>2a. Significant improvements in self-reported attitudes<br>2b. Significant improvements in self-reported knowledge and skills<br>3a. Self-reported significant improvement in effectiveness as a leaders and power and influence<br>3b. 100% of participants completed their projects.<br>4b. 58% of projects achieved IHI level 3 (moderate improvement in process measures) with 22% of these attaining level 4 (significant improvement in outcomes measures).                                                                                                                                                                                       | n/a       | 13.5         |
| Dannels, 2008 [9]                          | Single US university executive education programme | 78             | Female academic (associate or full professor level)                         | 1 year                     | Executive leadership development program for senior female faculty                                                                                         | Executive leadership education                                                                                                                                                                                                                                                                                                                                                                                                     | Not specified                                                                                                                                                                                                                                                                                                   | 2a. Aspiration to higher leadership position inside an academic health centre decreased;<br>2b. In all eight leadership composites, the exposure group mean (based on a seven-point scale) was slightly but significantly greater than the means in both the control groups. (average 0.2/7 increase)<br>3b. A higher percentage of participants have achieved leadership positions 4b. Promotion of increased number of female graduates achieved                                                                                                                                                                                                                                          | n/a       | 13           |
| Orme, 2019 [10]                            | Single UK hospital trust                           | 425            | Consultants and senior healthcare professionals and managers                | 12 months                  | 12 months with 5 workshop days spread over 6 months                                                                                                        | Five face-to-face delivery days, ongoing tele-phone coaching and the use of a benchmarked 360-degree profile. Project work. Interactive sessions. 3 days, then 1 day after 3 months, then 1 day after 6 months. Support via coaching between. 360 repeats at 12                                                                                                                                                                    | Not well reported: influence, behaviours, team behaviours, finances. From website: execution, people management, evaluation and feedback                                                                                                                                                                        | 1. Evaluation using the net promoter score gave 92% score (promoters-detectors/total)<br>2a. Reports of improved confidence<br>2b. Reports of improved skills and techniques, self-awareness and other-awareness.<br>3a. Reports of improvement in delegation skills, trust. Corroboration with interview questionnaire<br>3b. Multi source feedback showed statistically significant improvement in clarifying purpose, with several other categories approaching significance.<br>4a. Reports of improved team effectiveness.<br>4b. Savings of £3.3 million were identified through the delivery of 11 separate initiatives for a                                                        | 6         | 12.5         |

| Source (First Author, Year)                   | Setting                                         | Learner Number | Learner Type                                                                                                     | Intervention Length | Intervention Description                                                                                                                                | Teaching Methods                                                                                                                                                                                                                                                                                     | Educational Content                                                                                                                                                                              | Main findings by Kirkpatrick level                                                                                                                                                                                                                                                                                                                                                                                                                                                                                                                                                                                                                            | JBIScore | MERSQIScore |
|-----------------------------------------------|-------------------------------------------------|----------------|------------------------------------------------------------------------------------------------------------------|---------------------|---------------------------------------------------------------------------------------------------------------------------------------------------------|------------------------------------------------------------------------------------------------------------------------------------------------------------------------------------------------------------------------------------------------------------------------------------------------------|--------------------------------------------------------------------------------------------------------------------------------------------------------------------------------------------------|---------------------------------------------------------------------------------------------------------------------------------------------------------------------------------------------------------------------------------------------------------------------------------------------------------------------------------------------------------------------------------------------------------------------------------------------------------------------------------------------------------------------------------------------------------------------------------------------------------------------------------------------------------------|----------|-------------|
| Cole, 2017 [11]                               | Single US hospital department                   | 10             | Residents (Anaesthesiology PGY3/4)                                                                               | 2 weeks             | 2 week operating room management and leadership elective rotation                                                                                       | months<br>Action learning literature<br>reflective learning                                                                                                                                                                                                                                          | Non-technical skills                                                                                                                                                                             | Return On investment of 364%. Quality improvements were observed.<br>3a. Increased "re-evaluates and debriefs"; "gathers and actively seeks out information"; "anticipates changing environment"<br>3b. Increase across a range of metrics measuring teamwork, task management, clinical decision making, situational awareness, as measured by "anaesthetists' non-technical skills" (ants) questionnaire<br>3b. Statistically significant increase in leadership of national committees, production of national workshops and presentation at national platforms.                                                                                           | n/a      | 12.5        |
| Hafte HM, 2018 [12]                           | Single US specialty association, 45 sites       | 49             | Paediatric academic faculty                                                                                      | 10 months           | 3 sessions focussing on the individual, their training programme and interaction with others                                                            | "highly interactive format", peer mentorship                                                                                                                                                                                                                                                         | Professional development, leadership training, administrative skill development.                                                                                                                 | 3b. Participants increased significantly in their performance of 7 of the 10 tasks on the interdisciplinary ward round leadership assessment tool. Post-test, the participants performed these behaviours significantly more frequently than an experienced control group.                                                                                                                                                                                                                                                                                                                                                                                    | n/a      | 12.5        |
| Ten Have, 2013 [13]                           | Four Dutch ICUs (in Single hospital)            | 9              | Exposure: intensive care fellows<br>Control: experienced intensivists                                            | 23 months           | 1 day simulation, group feedback on videoed interdisciplinary rounds. (unclear when this was offered - before or after post-training video)             | Multiple learning activities including simulation; small group skill practice and problem-solving sessions; performance feedback and reinforcement of newly learned skills; and a planning assignment for on the job applications.                                                                   | Leading an interdisciplinary ward round                                                                                                                                                          | 3b. Participants increased significantly in their performance of 7 of the 10 tasks on the interdisciplinary ward round leadership assessment tool. Post-test, the participants performed these behaviours significantly more frequently than an experienced control group.                                                                                                                                                                                                                                                                                                                                                                                    | n/a      | 12.5        |
| Gilfoyle, 2007 [14]                           | Single Canadian residency program (paediatrics) | 29             | Residents (Paediatrics, PGY1-PGY4)                                                                               | 1/2 day             | Half-day workshop                                                                                                                                       | Plenary session followed by two simulated resuscitation scenarios                                                                                                                                                                                                                                    | Tasks required of a leader, effective communication skills within a team, and avoidance of fixation errors                                                                                       | 2b. Significantly increased knowledge of tasks and fixation errors, "greater understanding of the concepts of effective leadership and team functioning"<br>3b. Residents' performance significantly improved from scenario 1 to scenario 2 (63% vs. 82%, p< 0.05). Residents' scores were better during the first scenario of the initial workshop than those during the 6-month workshop who had never previously participated (control). (63% vs. 50%, p< 0.05).                                                                                                                                                                                           | n/a      | 12          |
| LoPresti, 2009 [15]                           | Four US residency programs                      | 6              | Residents (Family Medicine, PGY2)                                                                                | 2 years             | 60 hours of education in 20 modules.                                                                                                                    | Lectures, project work, in class exercises.                                                                                                                                                                                                                                                          | Leadership, quality improvement, policies, strategy and markets, insurance, finances, professional success, negotiation                                                                          | 1. Mean attendance of 66%<br>2b. Significant but small increase in test scores compared with control group                                                                                                                                                                                                                                                                                                                                                                                                                                                                                                                                                    | n/a      | 12          |
| Wurster, 2007 [16]                            | Single US department of surgery                 | 42             | Surgical fellows                                                                                                 | 6 months            | Long weekend of didactic study; teamwork on patient safety-related project; monthly conferences; 2 days for lectures and project presentations          | Didactic study, group projects with monthly conferences and project presentations and capstone lectures                                                                                                                                                                                              | Ability to understand cognitive processes and group dynamics underlying medical decision making; communication across patient care continuum; implementation of systems approach to patient care | 1. Reported leadership academy programme was more valuable than other patient safety initiatives<br>2a. Improved attitudes towards leadership roles<br>2b. Increased perceived leadership capability and knowledge across multiple skills and abilities<br>3a. Increased perceived functional skills in 5/8 areas. Increased preparedness to take a leadership role<br>4b. 1 out of 6 projects fully implemented                                                                                                                                                                                                                                              | n/a      | 12          |
| <b>Higher Reliability Studies (JBIS tool)</b> |                                                 |                |                                                                                                                  |                     |                                                                                                                                                         |                                                                                                                                                                                                                                                                                                      |                                                                                                                                                                                                  |                                                                                                                                                                                                                                                                                                                                                                                                                                                                                                                                                                                                                                                               |          |             |
| Pradarelli, 2016 [17]                         | Single US hospital department                   | 21             | Academic surgeons from assistant to full professor grade                                                         | 8 months            | 1 full day per month                                                                                                                                    | Didactic and experiential learning. Case studies, team improvement projects, multi-source feedback, debriefing with executive coach                                                                                                                                                                  | Leadership, team building, business acumen, and health care context                                                                                                                              | 1. Participants reported high levels of satisfaction with the programme, ranked a 8.7/10 (10 being excellent use of their time)<br>2a. Participants felt "not only enabled but also capable of effecting change in their local environments"<br>2b. Participants reported increased self-awareness and increased team-building skills, and improvement of leadership knowledge<br>3a. Participants reported improved ability to foster collaborative relationships, and general improvement of interactions and networks.                                                                                                                                     | 9        | 8           |
| Throgmorton, 2016 [18]                        | US Regional healthcare system                   | 21             | Physicians across a range of specialties                                                                         | 10 months           | 2.5h meetings/month +/- 2.3h of additional learning opportunities                                                                                       | Behavioural style assessment, multisource feedback, coaching, online discussions, online learning resources, team project in small groups                                                                                                                                                            | Intra/interpersonal effectiveness; resiliency; coaching; communication; teamwork; change management; business acumen; quality focus                                                              | 1. Ratings of 4/5 for evaluation of eight content sessions (lowest average 4.3)<br>2a, 2b. Completing disc assessment, 360 feedback and coach supported development plan<br>3a. 16/21 participants completed individual development plan; 21/21 completed the everything disc workplace profile<br>3b. Team presentations completed<br>4B: 106% return-on-investment calculated from "intangible benefits"                                                                                                                                                                                                                                                    | 8        | 11.5        |
| Bergman, 2009 [19]                            | Single Swedish hospital                         | 53             | Managers (9 physicians, 33 nurses, and 11 other health personnel)                                                | 7 week vs 17 months | 1: One week intensive course<br>2: Long-term support group (previously completed intensive)<br>3. Long-term support group (had not completed intensive) | A one-week course and a long-term support group. The intensive course consisted of modules using reflection and metre reflection supported by theoretical frameworks. The long term support group met half a day once a month for 1 to 2 years, to discuss problems that arise in the everyday work. | Group dynamics, communication, leadership theories                                                                                                                                               | 1. Participants emphasise the importance of the group as a "protected zone"<br>2a. Participants felt that they dared to be clearer. Both groups had improved attitude to leadership roles<br>3a. Participants from all groups reported using techniques in their workplace and personal lives, participants in the support groups reported exploring ways to handle changes in their work                                                                                                                                                                                                                                                                     | 8        | 10          |
| Monkhouse, 2018 [20]                          | National UK programme                           | 111            | Doctors (secondary and primary care), nurses, public health professionals, allied health professionals, managers | 3-9 months          | 3-9 month placement in a resource-poor country                                                                                                          | Formal training, identification of learning needs, mentoring, project work with overseas partner                                                                                                                                                                                                     | NHS healthcare leadership model, not otherwise specified                                                                                                                                         | 1. All interviewees agreed that the experience was valuable<br>2a. Increased percentage considering themselves to be leaders after the programme (78% after, 32% before), interviewees reported increased confidence.<br>2b. Increased self-awareness and leadership skills reported in questionnaire. Interviewees reported increased awareness of the leadership styles of others.<br>3a. 73% reported using their new skills. 18% reported not being able to use their skills. Interviewees reported changes in the way they relate to others.<br>4a. Several respondents noted they had planned to leave the NHS and decided to stay after the programme. | 8        | 8.5         |
| Tsoh JY, 2019 [21]                            | Single US academic healthcare centre            | 136            | Faculty members perceived to have leadership potential                                                           | 20 weeks            | 10 leadership modules over 20 weeks (75 Programme Hours)                                                                                                | Experiential learning NOS                                                                                                                                                                                                                                                                            | Self-awareness, critical thinking, effective communication, inclusion, collaboration, empowered professionalism                                                                                  | 1. Programme completion rate is 97.8%<br>2a. 76.4% of respondents said they developed an improved attitude towards their role and/or job at the university. Qualitative comments indicated improved confidence and aspiration.<br>2b. 98.6% of respondents reported noticeable changes in leadership skills<br>3a. 91.7% of respondents reported changes in leadership attitudes or behaviours. 62.5% reported seeking new leadership opportunities.                                                                                                                                                                                                          | 8        | 8.5         |

| Source (First Author, Year)   | Setting                                        | Learner Number | Learner Type                                                              | Intervention Length | Intervention Description                                                                                                                              | Teaching Methods                                                                                                                         | Educational Content                                                                                                                                                        | Main findings by Kirkpatrick level                                                                                                                                                                                                                                                                                                                                                                                                                                                                                                                                                                                                                                                                                                                                                                                                                                                                                                                                                                                                                                                                                                                                                                                                                                                                                            | JBI Score | MERSQI Score |
|-------------------------------|------------------------------------------------|----------------|---------------------------------------------------------------------------|---------------------|-------------------------------------------------------------------------------------------------------------------------------------------------------|------------------------------------------------------------------------------------------------------------------------------------------|----------------------------------------------------------------------------------------------------------------------------------------------------------------------------|-------------------------------------------------------------------------------------------------------------------------------------------------------------------------------------------------------------------------------------------------------------------------------------------------------------------------------------------------------------------------------------------------------------------------------------------------------------------------------------------------------------------------------------------------------------------------------------------------------------------------------------------------------------------------------------------------------------------------------------------------------------------------------------------------------------------------------------------------------------------------------------------------------------------------------------------------------------------------------------------------------------------------------------------------------------------------------------------------------------------------------------------------------------------------------------------------------------------------------------------------------------------------------------------------------------------------------|-----------|--------------|
| Bearman, 2012 [22]            | Single Australian residency program (surgery)  | 12             | Residents (Surgical trainees, midlevel across all specialties)            | 2 days              | Two day simulation course                                                                                                                             | Simulation, peer observations, multi-source feedback, reflection, lectures, videos, scenarios                                            | Patient-centred communication, inter-professional communication, teamwork, leadership and professionalism                                                                  | 3b. 9.6% of graduates reported a new leadership position; 12.4% of female graduates, 33.3% of underrepresented minority graduates.<br>1. All participants rated the course as good or very good. One third of participants described the communication scenario as "less than useful". All other aspects of the course were considered useful or highly useful.<br>2a. Increased awareness of the broader situation and the value of high-quality communication and teamwork<br>2b. Self-reported achievement of learning objectives including increased knowledge<br>1. Participants satisfied 51.5%-97%, useful 42.5%-84.8% on 7 topics<br>2a. 50%-96.7% report intention to implement                                                                                                                                                                                                                                                                                                                                                                                                                                                                                                                                                                                                                                      | 8         | 7.5          |
| Carney, 2015 [23]             | 12 US Primary Care residencies (4 locations)   | 33             | Faculty (Family medicine, internal medicine, Paeds)                       | 6 months            | 2.5day session with followup over 6 months                                                                                                            | Didactic small-group sessions webinars conference calls visits by core faculty                                                           | Leadership change management teamwork population management clinical microsystems competency assessment patient-centredness and patient-centred-medical-home principles    | 1. Scores for relevance and quality of simulations on questionnaire and free-text comments rated >5/10.<br>2a. The simulation helped participants recognize problems with speaking up.<br>2b. Gained understanding about shifting from blame to learning oriented leadership, facilitating communication and teamwork, being welcoming rather than defensive, and other self-reflections.<br>1. Participants were happy with the course<br>2a. Participants reported improved confidence and judgement skills<br>2b. Participants reported improved leadership skills<br>3a. Participants reported taking new approaches to their roles<br>3b. Participants reported new roles<br>4b. Projects had significant system impact including organisational changes, improved patient experiences, cost savings.                                                                                                                                                                                                                                                                                                                                                                                                                                                                                                                    | 8         | 7.5          |
| Cooper, 2011 [24]             | Single US academic medical centre              | 108            | Physicians, nurses, allied health professionals, administrators, managers | 1 day               | Workshop                                                                                                                                              | Seminar simulation review of data from safety climate survey team project                                                                | Individual and collective leadership, recognizing difference in perspectives between managers and clinicians, how to speak up to voice concerns, specifically              | 1. Scores for relevance and quality of simulations on questionnaire and free-text comments rated >5/10.<br>2a. The simulation helped participants recognize problems with speaking up.<br>2b. Gained understanding about shifting from blame to learning oriented leadership, facilitating communication and teamwork, being welcoming rather than defensive, and other self-reflections.<br>1. Participants were happy with the course<br>2a. Participants reported improved confidence and judgement skills<br>2b. Participants reported improved leadership skills<br>3a. Participants reported taking new approaches to their roles<br>3b. Participants reported new roles<br>4b. Projects had significant system impact including organisational changes, improved patient experiences, cost savings.                                                                                                                                                                                                                                                                                                                                                                                                                                                                                                                    | 8         | 6.5          |
| Agius, 2015 [25]              | Single UK deanery                              | 8              | Specialty trainees (psych, renal, GUM, ENT)                               | 4 years             | Four-year part-time programme to Master's level with academic and vocational components                                                               | Diploma/MSc modules Action learning sets Workplace-based projects Shadowing placements Leadership development tools (self-reflection)    | MLCF competencies Leadership, policy, organisational development, governance                                                                                               | 1. Participants were overwhelmingly endorse the programme and would recommend it to other trainees.<br>2a. Increased self-confidence as leaders (87% of respondents) and willingness to speak up<br>2b. Increased understanding of health systems, policy, team working skills with diverse groups, networking<br>3a. 60% of graduates report being actively involved in service improvements post-programme 48% of graduates reported difficulties transferring their training back to their clinical practice.<br>3b. 63% of graduates had gone on to further leadership/management development as a result of the programme<br>4b. Host organisations describe a range of benefits and examples of the impact of fellows' work on their organisations, including financial impact (e.g. Income generation, cost savings) and a range of deliverables (e.g. Reports, publications, research studies).                                                                                                                                                                                                                                                                                                                                                                                                                       | 7         | 10.5         |
| McKimm J, 2019 [26]           | National UK programme                          | 145            | Residents (Specialty and GP doctors in training)                          | 1 year              | Immersive internship out of practice with the most senior personnel in national and healthcare-related organisations                                  | Immersive internship, visits to other host organisations and Parliament, teaching on leadership and management, and action learning sets | Policy development, project management, research and analysis, writing and publishing, professional networking skills.                                                     | 1. Participants overwhelmingly endorse the programme and would recommend it to other trainees.<br>2a. Increased self-confidence as leaders (87% of respondents) and willingness to speak up<br>2b. Increased understanding of health systems, policy, team working skills with diverse groups, networking<br>3a. 60% of graduates report being actively involved in service improvements post-programme 48% of graduates reported difficulties transferring their training back to their clinical practice.<br>3b. 63% of graduates had gone on to further leadership/management development as a result of the programme<br>4b. Host organisations describe a range of benefits and examples of the impact of fellows' work on their organisations, including financial impact (e.g. Income generation, cost savings) and a range of deliverables (e.g. Reports, publications, research studies).                                                                                                                                                                                                                                                                                                                                                                                                                            | 7         | 10.5         |
| Cohen, 2017 [27]              | Multiple UK health care organizations (London) | 69             | Consultants (32), Registrars (35), Grade not identified (2)               | 1 day               | Workshop                                                                                                                                              | Lecture-style presentations policy leadership simulation                                                                                 | Background of NHS reform healthcare challenges                                                                                                                             | 1. All measures above 4/5 on Likert scales including "I recommend this simulation to colleagues at my professional stage" (4.50) and "I would like to take part in similar simulation events in future".<br>2a. Self-reported "learning from the simulation will help me deliver better long term care to my patients" (4/5)<br>2b. Self-reported increase in understanding of healthcare organisation (4.55/5) in all seven knowledge areas (regulation of health care providers, role of patient organizations, organizational accountability, role of local authorities, financial climate, roles and responsibilities of commissioners and care providers), there was a significant improvement in perceived knowledge scores.<br>3a. Capability was the only construct that showed a large and significant change post-simulation. There was a moderate but significant change in behavioural intentions, attitudes and subjective norms postsimulation, although there was no significant change detectable in opportunity in the short time between the simulation and feedback, 22 clinicians stated that their experiences in the crucible simulation had directly influenced their leadership practice increase in perceived self-efficacy postsimulation (mean score presimulation, 3.87 to postsimulation, 4.08). | 7         | 10           |
| Ruston, 2010 [28]             | Single UK deanery                              | 3              | Residents (General Practice Specialty Trainees)                           | 4 months            | 2 days per week for 4 months                                                                                                                          | Peer learning sets, meetings, project work, reflective diaries                                                                           | Strategic and contextual issues, commissioning, design and delivery of health care, service redesign, public health agenda, leadership, management and partnership skills. | 1. All respondents were positive about the value and success of the programme<br>2b. "evidence indicated that the [trainees] had met their core curriculum competencies at the level expected.". Trainees reported gaining an understanding of how good leaders hold a vision of the future and motivate people. All respondents, including observers, reported a marked increase in the trainee knowledge. Increased self-awareness<br>3a. Trainees reported using the skills learned during their project work<br>3b. Observers reported change in trainee behaviour, use of language, and use of skills. Supervisors also reported cultural barriers and organisational silos being broken down.                                                                                                                                                                                                                                                                                                                                                                                                                                                                                                                                                                                                                           | 6         | 10.5         |
| <b>Other Included Studies</b> |                                                |                |                                                                           |                     |                                                                                                                                                       |                                                                                                                                          |                                                                                                                                                                            |                                                                                                                                                                                                                                                                                                                                                                                                                                                                                                                                                                                                                                                                                                                                                                                                                                                                                                                                                                                                                                                                                                                                                                                                                                                                                                                               |           |              |
| Hackworth J, 2018 [29]        | Single US hospital                             | 99             | Medical faculty members with supervisory or team leader responsibility    | 10 months           | 68 hours of learning over 10 month course. Two one-day seminars, one two-day off-site session, seven monthly four hour meetings, reading assignments. | Seminars, experiential activities, small group discussions, multisource feedback, teambuilding activities, reading                       | Emotional intelligence, leadership behaviours, leadership foundation skills                                                                                                | 1. 94% of participants would recommend the programme to others, training rated as worthwhile investment (6.7/7)<br>2a. Statistically significant increased confidence in leadership ability<br>2b. Statistically significant improvement in 25/26 leadership measure<br>3a. Statistically significant increase in seeking ways to maximise application of leadership strengths and to overcome leadership limitations<br>3b. Statistically significant improvement in communication of leadership strengths and in confidence as seen by managers                                                                                                                                                                                                                                                                                                                                                                                                                                                                                                                                                                                                                                                                                                                                                                             | 3         | 11.5         |

| Source (First Author, Year) | Setting                                                                                | Learner Number             | Learner Type                                                                                                                                     | Intervention Length | Intervention Description                                                                                     | Teaching Methods                                                                                                                                                                                                                                                         | Educational Content                                                                                                                                                                                                                                                                                                                                                                                                           | Main findings by Kirkpatrick level                                                                                                                                                                                                                                                                                                                                                                                                                                                                                                                                                                                                                                                                                                                                                                                                                                                                                                                                                                                                                                                                                                                                                                                                                                                                                                                                                                                                     | JBI Score | MERSQI Score |
|-----------------------------|----------------------------------------------------------------------------------------|----------------------------|--------------------------------------------------------------------------------------------------------------------------------------------------|---------------------|--------------------------------------------------------------------------------------------------------------|--------------------------------------------------------------------------------------------------------------------------------------------------------------------------------------------------------------------------------------------------------------------------|-------------------------------------------------------------------------------------------------------------------------------------------------------------------------------------------------------------------------------------------------------------------------------------------------------------------------------------------------------------------------------------------------------------------------------|----------------------------------------------------------------------------------------------------------------------------------------------------------------------------------------------------------------------------------------------------------------------------------------------------------------------------------------------------------------------------------------------------------------------------------------------------------------------------------------------------------------------------------------------------------------------------------------------------------------------------------------------------------------------------------------------------------------------------------------------------------------------------------------------------------------------------------------------------------------------------------------------------------------------------------------------------------------------------------------------------------------------------------------------------------------------------------------------------------------------------------------------------------------------------------------------------------------------------------------------------------------------------------------------------------------------------------------------------------------------------------------------------------------------------------------|-----------|--------------|
| Al-Mutawa, 2016 [30]        | Family medicine residency programme Qatar                                              | 39                         | Residents (family medicine year 1-4)                                                                                                             | 5 days              | 5 day practice management workshop                                                                           | Didactic teaching case studies<br>small group discussions<br>team exercises                                                                                                                                                                                              | Professionalism<br>interpersonal skills<br>practice-based learning and improvement<br>system-based practice                                                                                                                                                                                                                                                                                                                   | 2a. Increased confidence<br>2b. Increased self-assessed risk management, conflict management, communication skills, time management, ability to write objectives<br>3b. Supervisor-reported increase in effective use of hospital resources, coordination of patient care, patient communication skills                                                                                                                                                                                                                                                                                                                                                                                                                                                                                                                                                                                                                                                                                                                                                                                                                                                                                                                                                                                                                                                                                                                                | n/a       | 11.5         |
| Fernandez, 2016 [31]        | Single US college (O&G)                                                                | 37                         | Obstetricians (Junior fellows, young physicians, senior fellows, not otherwise specified)                                                        | 3.5 days            | 3.5 day national intensive leadership development for O&G physician leaders                                  | Interactive skills-building workshops, series of leadership and psychological assessment tools, including a 360-degree assessment. Formal coach debrief of assessment, small and large group sessions                                                                    | Organisational culture, leading and empowering, communication, motivation, advocacy, media, negotiation skills, health policy                                                                                                                                                                                                                                                                                                 | 1. 100% of respondents indicated that they would recommend the course to colleagues<br>2b. Posttest scores were significantly and meaningfully higher than pretest at the p<.0001 level in all 10 targeted leadership skills, both immediately following completion of the course and at 6 months post completion. Mean differences ranged from 0.8 to 1.81 (5 point scale from unskilled to highly skilled)<br>3a. Respondents reported having used skills learned in their day to day job.<br>3b. 9/26 respondents had expanded leadership responsibilities in a new role.                                                                                                                                                                                                                                                                                                                                                                                                                                                                                                                                                                                                                                                                                                                                                                                                                                                           | 4         | 11           |
| Chang, 2019 [32]            | Three US healthcare organisations in 24 US states                                      | 65                         | 49 Physicians (46 Geriatrics)<br>1 Dentist<br>3 Nurses<br>6 Pharmacists<br>1 Psychologist<br>1 Social Worker<br>1 Speech Pathologist             | 9 months            | 55hrs                                                                                                        | Orientation, large-group workshop, two in-person meetings, monthly small group videoconferences<br>disc personality type instrument, 1:1 coaching, structured networking, independent reading and reflection<br>individual leadership project                            | Adaptive leadership managing reactivity<br>courage and generosity<br>mission, vision, goals disc(r)assessment<br>motivation and resilience<br>managing transitions influence and persuasion<br>intrinsic and extrinsic rewards<br>stories and advice presentation skills messaging and marketing strategy and stakeholders<br>evaluation design<br>scaling up<br>business case and budget measuring impact project management | 1. Mean satisfaction score of 4.86/5<br>2a. Significant increases in confidence in all sub-domains: self-awareness self-management empathy communication planning and execution (overall mean increased from 5.8/9 to 8.0/9)<br>2b. Some scholars stated that they gained confidence and skills from the program.<br>3a. Scholars reported intentionally continuing as a sustaining community of national colleagues after the conclusion of the program, offering peer mentoring, sharing speaking opportunities, and co-authoring manuscripts<br>3b. Scholars gave 85 presentations and published 63 manuscripts, and reported accepting local and national leadership positions as a result of the programme.<br>4b. Scholars received 21 awards, in addition to receiving funding and program cost savings from their training and practicum.                                                                                                                                                                                                                                                                                                                                                                                                                                                                                                                                                                                      | 1         | 11           |
| Day, 2010 [33]              | Single US specialty association (orthopaedics)                                         | 100                        | Orthopaedic surgeons                                                                                                                             | 1 year              | Mentoring by established orthopaedic leader                                                                  | Mentoring                                                                                                                                                                                                                                                                | Unclear                                                                                                                                                                                                                                                                                                                                                                                                                       | 2b. Significant increase in 3/8 leadership domains: knowledge of theory, tolerance for demands of leadership, and leadership positioning.<br>3b. Significant increase in the number of national committee chairs (22% pre, 62% post-programme, p < 0.001). 48% of alumni advanced in academic rank vs 21% of controls (p = 0.005)                                                                                                                                                                                                                                                                                                                                                                                                                                                                                                                                                                                                                                                                                                                                                                                                                                                                                                                                                                                                                                                                                                      | n/a       | 11           |
| Korschun, 2007 [34]         | Single US academic medical centre                                                      | 70                         | Physicians (29), nurses, and a wide range of administrators                                                                                      | 5 months            | Five three-day sessions over five months                                                                     | Lectures, seminars, case studies, experiential exercises, individual assessment, executive coaching, including a 360° assessment, mentoring, team project work                                                                                                           | Strategic thinking and personal awareness, Leadership qualities, Leadership best practices, negotiating tactics and managing conflict Human resources and talent management, Building collaboration and influence skills, Marketing, development and public policy, Leadership in changing times, Communications, media relations, crisis management                                                                          | 1. Participants reported positive experiences with the program. Attendance was at a rate of 95% or higher. 24% of respondents disagreed that the mentoring process had helped them with their professional growth.<br>2a. 98% increased their commitment to and support of the vision and strategies of the organisation<br>2b. All respondents agreed to some degree that they had improved their interpersonal skills related to team leadership and that they had improved their approach to functioning in a team setting. Participants reported increased knowledge of the organisation.<br>3a. 93% reported the programme has made them more effective leaders. 85% report that they have become advocates for the organisation's strategy. Graduates reported being more effective in committees within their school or the university.<br>3b. 15% of graduates were promoted within the followup period. 76% reported taking on additional leadership responsibilities. 4a. Fellows stated that the leadership academy allowed them to establish a strong network of friends and colleagues from other disciplines, and after the program was over, they found it much easier to seek advice or establish collaborations with peer leaders in other parts of the organisation. 96% of respondents reported being more likely to stay with the organisation.<br>4b. Successful adoption of most projects into the organisation. | n/a       | 11           |
| McDade, 2004 [35]           | Multiple US and Canada Academic Medical Centres (AMCs)                                 | 79                         | Associate or full professor                                                                                                                      | 7 months            | Three 1-week meetings across 7 months                                                                        | Leadership skill development, mentoring, and networking                                                                                                                                                                                                                  | The curriculum focuses on building knowledge and skills in seven domains: paradigms of corporate, government, and academic leadership; financial management; strategic planning and organizational transformation; emerging issues in academic medicine; communication; personal dimensions of leadership; and career advancement strategies.                                                                                 | 2a. Increase confidence in applying conflict resolution strategies, and with public speaking.<br>2b. Significant increases (p<0.001) in knowledge of organization, management, and leadership theory, financial management, environmental scanning, job negotiations, risk management, life balancing<br>3a. Increase in reports of having a mentor<br>3b. No clear effect on career progression.<br>4b no significant increase in tangible benefits from projects.                                                                                                                                                                                                                                                                                                                                                                                                                                                                                                                                                                                                                                                                                                                                                                                                                                                                                                                                                                    | n/a       | 11           |
| Edmonstone, 2011 [36]       | UK National programme (Scotland)                                                       | 117 (from total 5 cohorts) | Senior strategic leaders in NHS Scotland: hospital doctors, primary care doctors, nurses, AHPs, pharmacists, psychologists, dentists, paramedics | 12 months           | A three-day residential development centre followed by nine two-day residential events held every six weeks. | Coaching, Mentoring, Action Learning, Change Management Project, Masterclasses/Workshops, After Dinner Speakers, Shadowing, Organisational Visits, Chief Executive Sponsorship, multi-source feedback, psychometric tools, Development Centre, Personal Development Plan | Self-leadership, leading others, collaborative working, delivering excellence through others, managing complex change, improving patient experience, political awareness, strategic dexterity, aligning agendas/creating culture                                                                                                                                                                                              | 1- all elements of the programme were positively rated by participants with ratings becoming more positive as the programme progressed.<br>2a - increased self-awareness and insight, greater personal resilience and improved motivation.<br>2b - participants "appear to have gained tremendous personal benefit" which focused on confidence to operate outside their initial comfort zone; greater clarity about their leadership role; greater assurance about their own leadership capability and sense of empowerment; greater awareness and knowledge of policy issues and the need to develop skills in the areas of strategic influence.<br>3a - improved relationship-building and networking skills and the development of improved influencing ability.<br>3b - positive feedback was also offered by those around the participants in their employing organisations. In responding to telephone interviews and questionnaires, these colleagues, managers and staff of participants reported significant behaviour change.<br>4b- successful completion of significant service development through leadership projects had made significant impact locally and nationally.                                                                                                                                                                                                                                               | 5         | 10.5         |
| MacPhail, 2015 [37]         | Single Australian Hospital Department (Geriatrics, Rehabilitation and Palliative Care) | 39                         | Non-executive middle or senior level medical, nursing and allied health professionals                                                            | 9-10 months         | 2-hour monthly sessions, group projects, site visits                                                         | Guest speakers and discussions<br>external site visit, project, presentation                                                                                                                                                                                             | Organisational structure, healthcare context, leadership and patient safety, quality of care and clinical errors, complex systems, communication, engagement with patients, conflict, negotiation, change management                                                                                                                                                                                                          | 1. Participants reported almost unanimously (86-100%) for all measures including that the course was relevant and valuable<br>2a. Participants reported increased willingness to take on leadership roles<br>3a. Participants reported in comments that they benefited from increased networking and relationships across silos.<br>3b. 4 of 17 participants from the first cohort had been promoted 18 months after the programme (no control group available)                                                                                                                                                                                                                                                                                                                                                                                                                                                                                                                                                                                                                                                                                                                                                                                                                                                                                                                                                                        | 5         | 10.5         |

| Source (First Author, Year) | Setting                                                            | Learner Number       | Learner Type                                                                                                                      | Intervention Length | Intervention Description                                                                                 | Teaching Methods                                                                                                                                                                                                                        | Educational Content                                                                                                                                                                                                                                                                              | Main findings by Kirkpatrick level                                                                                                                                                                                                                                                                                                                                                                                                                                                                                                                                                                                                                                                                        | JBI Score | MERSQI Score |
|-----------------------------|--------------------------------------------------------------------|----------------------|-----------------------------------------------------------------------------------------------------------------------------------|---------------------|----------------------------------------------------------------------------------------------------------|-----------------------------------------------------------------------------------------------------------------------------------------------------------------------------------------------------------------------------------------|--------------------------------------------------------------------------------------------------------------------------------------------------------------------------------------------------------------------------------------------------------------------------------------------------|-----------------------------------------------------------------------------------------------------------------------------------------------------------------------------------------------------------------------------------------------------------------------------------------------------------------------------------------------------------------------------------------------------------------------------------------------------------------------------------------------------------------------------------------------------------------------------------------------------------------------------------------------------------------------------------------------------------|-----------|--------------|
| Cerrone, 2017 [38]          | Large US integrated health care organization                       | 80                   | Residents (Incoming Chief Residents)                                                                                              | 1 day               | 9hrs                                                                                                     | Emotional intelligence inventory three weeks prior to course didactic sessions simulated teaching encounters                                                                                                                            | Leadership, managing, and core feedback skills, interpretation of emotional intelligence inventory, interpersonal and communication skills and professionalism                                                                                                                                   | 1. 92% agreed that the program met their learning needs. Participants reported considering the OSTETs useful.<br>3b. OSTET scores (out of 100) increased from mean = 47.92, SD = 7.8 to mean = 51.22, SD = 6.9; t (68) = 1.99, p = 0.006                                                                                                                                                                                                                                                                                                                                                                                                                                                                  | 1         | 10.5         |
| Patel, 2015 [39]            | Single US hospital                                                 | 30                   | Residents (PGY2-4)                                                                                                                | 2 years             | 2 year healthcare leadership in quality residency track                                                  | Core curriculum (120 hours over 3 weeks including lectures, readings, videos, small group activities, online modules, facilitated discussions), integration into a quality improvement leadership team, capstone qi project, mentorship | Methods and tools of quality improvement and patient safety, human factors engineering and safety culture.                                                                                                                                                                                       | 1. The core curriculum has been rated as highly valuable and necessary (mean 4.95 and 4.96/5 respectively)<br>2b. Mean improvement of quality improvement knowledge assessment was 3 points for cohort 1 (SD 3), 4 points for cohort 2 (SD 1.6). Improvements were marked by the track directors. No significance reported<br>3a. Graduates reported that they intend to pursue quality/safety leadership positions (13 strongly agree, 1 agree)<br>3b. All graduates have completed their projects. 12 posters presented at national conferences regarding capstone qi projects.<br>4b. "most of the capstone projects have resulted in improvements in health care delivery" - not otherwise specified. | n/a       | 10.5         |
| Nakanjako, 2015 [40]        | Four African and 4 US universities                                 | 15                   | Unclear                                                                                                                           | 1 year              | 1 year fellowship                                                                                        | 8 weeks of didactic teaching, with two 4.5 month experiential trainings at health organisations. Also 4 online modules. Mentoring (weekly meetings, monthly mentoring team meeting). Logbook for learning.                              | Leadership, communication, monitoring and evaluation, health informatics, research methodology, grant writing, implementation science, and responsible conduct of research.                                                                                                                      | 2b. Participants reported improved skills and knowledge 3a. Participants reported use of new knowledge and skills in both current and new leadership roles<br>3b. All graduates have remained in health leadership positions in Uganda. 86% (13/15) have opted to take on new responsibilities.<br>4b. Individual projects completed on the programme had a range of positive outcomes. These amounted primarily to official recommendations and initiation of new pathways, but several of the projects are reported to have improved patient care.                                                                                                                                                      | 2         | 10           |
| Kuo, 2010 [41]              | Single US residency program                                        | 16                   | Residents (Paediatrics PGY1-3)                                                                                                    | 3 years             | Bespoke residency programme                                                                              | Small-group seminars, project work, and mentoring                                                                                                                                                                                       | Themes of leadership, critical thinking, and community engagement. Topics include policy making, project management, decision making and communication                                                                                                                                           | 1. Satisfaction with programme 3.73/4 ±0.46<br>2a. Positive impact on plans to influence population health and health policy 3.53±0.64 and to serve minority or underserved populations 3.47±0.74<br>2b. Improvement of competence as a leader 3.40±0.74<br>3b. Participants have received both local and national awards recognizing their leadership and commitment to the community. Nine graduates are in positions of leadership such as medical directorships<br>4b. 9/16 graduates have received grants to support their projects. Multiple projects have achieved sustainable funding and impact across advocacy, health programme development and policies.                                      | 1         | 10           |
| Brandon, 2013 [42]          | Single US residency program (radiology)                            | 44                   | Residents (Radiology)                                                                                                             | 1 year              | 7x 90min modules                                                                                         | lectures and case-based group discussions                                                                                                                                                                                               | Finances, quality improvement, employment, organisational dynamics, healthcare policy and economics, negotiation and conflict management                                                                                                                                                         | 2a. Significant improvement in participants' knowledge for all modules (p<.001) 2b. Significant improvement in participants' self-assessed confidence scores for all modules (p<.001)                                                                                                                                                                                                                                                                                                                                                                                                                                                                                                                     | n/a       | 10           |
| Green, 2002 [43]            | US network of community-owned health care providers and physicians | 26                   | 26 Teams from eight organizational units                                                                                          | 2 years             | Coaching and leadership initiative                                                                       | Faculty coaching<br>Quality improvement projects<br>Team meetings, with team learning sessions and planning for six-month action period following the meetings. Teams from subsequent waves overlapped                                  | Diffusion of innovation, Strategic goal-setting, engaging others, PDSA, barrier-busting and infrastructure-building, project management, reflective thinking and learning, conceptual thinking, summarizing and communicating, coaching, and building further organizational capacity for spread | 4b. 17 of 26 teams reported significant clinical improvements in targeted areas, improvement work has become easier with each cycle (improved from 50% of projects within 3 weeks in cycle 1, to 100% in cycle 3)                                                                                                                                                                                                                                                                                                                                                                                                                                                                                         | n/a       | 10           |
| Hemmer, 2007 [44]           | Single US residency/fellowship program (pathology)                 | 16                   | Residents and fellows (Pathology)                                                                                                 | 1 year              | 6 x 1-2 day workshops (average 10hrs per workshop)                                                       | Pre-reading, didactic lectures, interactive sessions, case scenarios, team-building exercises, project Workshops, evening sessions, Project with poster or a short oral presentation                                                    | Leadership and management basics, managing change and interpersonal skills, personnel issues, quality, informatics, finance, and a capstone seminar                                                                                                                                              | 1. Participants evaluated (five-point scale) the content and speakers (scores from 4.4 to 5.0).<br>2b. Participants showed significant improvement in their leadership and management test scores (61/62 % to 88% in two different cohorts)                                                                                                                                                                                                                                                                                                                                                                                                                                                               | n/a       | 10           |
| McCurdy, 2004 [45]          | Single US academic medical centre                                  | 22                   | Faculty members (who were, at the time of the course, in a leadership position or likely to move into a leadership position soon) | 12 months           | Eight 3-hour sessions in two 2-day blocks 6 months apart and 2 evening small group discussions           | Workshops, evening sessions, Project with poster or a short oral presentation                                                                                                                                                           | Setting goals, leadership, change, emotional intelligence, organisational dynamics, mediation and negotiation, quality improvement                                                                                                                                                               | 2b. Post-program self-assessments significantly and meaningfully different from pre-programme using both traditional and retrospective measurement.<br>3b. 14 projects completed                                                                                                                                                                                                                                                                                                                                                                                                                                                                                                                          | n/a       | 10           |
| Hadley, 2014 [46]           | Single UK training deanery                                         | 30                   | Residents (PGY2 doctor/s paired with a management trainee)                                                                        | 6-9 months          | Paired quality improvement project with a management trainee and a PGY2 doctor                           | Project work, mentoring, action learning sets                                                                                                                                                                                           | No formal curriculum                                                                                                                                                                                                                                                                             | 1. Continued engagement from 24/30 participants for the programme<br>2a. Participants felt empowered to start service improvement projects<br>2b. Statistically significant increase in self-reported understanding of several domains (statistics and data not reported)<br>3b. Projects presented by 9 of 14 teams                                                                                                                                                                                                                                                                                                                                                                                      | 3         | 9.5          |
| Revere, 2015 [47]           | Single US hospital network                                         | 50                   | Senior physicians "chairs and near-chairs"                                                                                        | 6 months            | Fortnightly full-day sessions, project work                                                              | Lectures, discussions, projects                                                                                                                                                                                                         | Strategy, finance and accounting, organizational performance measures, including clinical quality, human resources and customer experience management, organizational behaviour and team building and leadership skills.                                                                         | 1. Course rated 4.69/5. 71% rated topics as relevant<br>2a. Participants reported changed perspectives<br>2b. Participants reported learning from the lectures<br>3a. Participants reported being more engaged in their conversations, and applying learning day-to-day<br>4b. 40 per cent of the course projects have been funded by and implemented within the participant's respective institution. Senior sponsors have continued to be satisfied with project and programme outcomes and continue to send participants                                                                                                                                                                               | 3         | 9.5          |
| Osborn, 2004 [48]           | Ten US Paediatric Association locations                            | 32 (total 2 cohorts) | Paediatricians from AMCs                                                                                                          | 2-3 years           | Three 2-day workshops during first 12 months, then 2 advanced workshops annually (only one for cohort 2) | Workshops, project                                                                                                                                                                                                                      | 3 Clusters: 1) institutional leadership concepts; institutional leadership skills; management skills (very good table in the paper with details of each).                                                                                                                                        | 2b. Reported increased knowledge and skills in all areas related to giving workshops<br>3a. Participants reported that they incorporated into their workshops knowledge and skills gained in 1) mission, vision, and values; 2) how to approach organisational change; 3) mission-based management; 4) net- working and team building; and 5) workshop development<br>3b. Across a 2-year follow-up period: 13/30 (43%) conducted a workshop, 2/30 (7%) were promoted, 18/30 (60%) participants assumed a leadership position<br>participants conducted 57 local workshops and 33 regional or national workshops that were attended by 1082 participants.                                                 | 2         | 9.5          |

| Source (First Author, Year) | Setting                                                         | Learner Number                            | Learner Type                                                                                                                              | Intervention Length         | Intervention Description                                                                                                                                               | Teaching Methods                                                                                                                                                                                       | Educational Content                                                                                                                                                                                                                                                                                                                                                                            | Main findings by Kirkpatrick level                                                                                                                                                                                                                                                                                                                                                                                                                                                                                    | JBI Score | MERSQI Score |
|-----------------------------|-----------------------------------------------------------------|-------------------------------------------|-------------------------------------------------------------------------------------------------------------------------------------------|-----------------------------|------------------------------------------------------------------------------------------------------------------------------------------------------------------------|--------------------------------------------------------------------------------------------------------------------------------------------------------------------------------------------------------|------------------------------------------------------------------------------------------------------------------------------------------------------------------------------------------------------------------------------------------------------------------------------------------------------------------------------------------------------------------------------------------------|-----------------------------------------------------------------------------------------------------------------------------------------------------------------------------------------------------------------------------------------------------------------------------------------------------------------------------------------------------------------------------------------------------------------------------------------------------------------------------------------------------------------------|-----------|--------------|
| Wichman, 2009 [49]          | Single US hospital department                                   | 6                                         | Residents (Psychiatry PGY3)                                                                                                               | 8 months                    | Weekly seminars (8 modules x 4 sessions each), with projects and mentoring                                                                                             | Lectures, discussions, projects, mentoring                                                                                                                                                             | Financial management, Human resources management, Planning and marketing, Information management, Risk management, Governance and organizational dynamics, Business and clinical operations, Professional responsibility.                                                                                                                                                                      | 4b. Across a 2-year follow-up period 8/30 (27%) obtained a peer-reviewed grant<br>1. All respondents said course met or exceeded their expectations.<br>3b. Multiple projects completed during programme<br>4b. One project resulted in decreased non-attendance by new patients by 50% across 12 months                                                                                                                                                                                                              | n/a       | 9.5          |
| Monaghan, 2018 [50]         | Single UK hospital trust                                        | 12 (6 doctors)                            | Residents (non-training clinical development and clinical teaching fellows, managers of various departments)                              | 6 months                    | 6 month paired learning doctors/managers                                                                                                                               | 6-month paired learning matching doctors with managers. Shadowing, conversations, reflections                                                                                                          | Nr                                                                                                                                                                                                                                                                                                                                                                                             | 2a. Physician participants reported feeling more prepared for a range of leadership requirements, including understanding decisions and working in teams and with managers<br>4b. Two pairs collaborated to successfully implement a lasting organisational change in the form of a trainee management forum                                                                                                                                                                                                          | 4         | 9            |
| Voogt, 2016 [51]            | Six Dutch teaching hospitals                                    | NR (~50)                                  | Residents (mixed specialties and levels)                                                                                                  | 1 year                      | Four 1hr meetings to discuss and plan projects                                                                                                                         | Facilitated discussions, project work                                                                                                                                                                  | Quality improvement and leadership, not otherwise specified                                                                                                                                                                                                                                                                                                                                    | 2a. Interviewees reported feeling empowered 2b. Interviewees reported increased awareness of organisational aspects of healthcare delivery.<br>4a. Outcomes of projects e.g. Development of new handover guidelines to ensure the attending physician is present at handovers                                                                                                                                                                                                                                         | 3         | 9            |
| Heitkamp, 2017 [52]         | Single US hospital department                                   | 98                                        | Residents (radiology)                                                                                                                     | NR (variable, journal club) | One hour lunchtime Journal club meeting every fortnight                                                                                                                | Journal club, projects, mentoring, leadership role placement                                                                                                                                           | Leadership (topics chosen by the group on an ad hoc basis)                                                                                                                                                                                                                                                                                                                                     | 2a. Participants felt better prepared for their careers<br>2b. Self-reported increased understanding of the business of radiology<br>3a. Self-reported improved communication, interaction with referring physicians, career development team building, group dynamics, and interactions with hospital administration<br>3b. 35% had assumed leadership roles within three years. Publication of 27 articles in core radiology journals, completion of multiple projects 4b. New external collaboration for residents | 0         | 9            |
| Pearson, 2018 [53]          | UK leadership fellowship                                        | 12                                        | Residents (senior, medicine, general practice, surgery, obstetrics and gynaecology, paediatric surgery and psychiatry. Residents (PGY1-4) | 1 year                      | 1 year out-of-programme fellowship in a host organisation                                                                                                              | Symposia and conferences, one-to-one coaching sessions, action learning sets, shadowing opportunities and reflective practice including completion of a portfolio. Project work for host organisations | Minimally reported. Communication, working styles and leadership framework mentioned                                                                                                                                                                                                                                                                                                           | 1. Most participants reported that all components of the course were very or slightly useful. 75% did not access multi-source feedback component.<br>2a. Most participants reported improved attitudes towards leadership and their ability to make changes in their organisation. Reports of increased confidence.<br>2b. Reports of increased awareness of other working styles and characteristics of good leadership.<br>3a. Reports of adjusting behaviour towards other working styles                          | 0         | 9            |
| Crites, 2004 [54]           | Single US residency program (internal medicine and paediatrics) | 13                                        | Residents (PGY1-4)                                                                                                                        | 1 year                      | Monthly seminar series                                                                                                                                                 | Interactive lectures                                                                                                                                                                                   | Coding, finances, group dynamics, human resources, risk management                                                                                                                                                                                                                                                                                                                             | 1. Participants rated the course effectiveness 4.13/5<br>2a. The residents' views towards practice management education in general had mean scores of 4.67 (5)<br>2b. Participants scored significantly higher on a self-assessed management skill, from 2.62 to 3.65 (5). Average score on knowledge test significantly increased from 74% to 91%<br>3b. Three projects undertaken as part of voluntary elective<br>4b. One project resulted in a reduction of admission time of 65 minutes                          | n/a       | 9            |
| Dickey, 2014 [55]           | Single US hospital                                              | Unclear (3 leadership projects described) | Residents (Psychiatry PGY1-4)                                                                                                             | 4 years                     | Modular leadership programme over 4 years with mostly voluntary components                                                                                             | Seminars, with voluntary simulations, action teams work, electives, mentoring                                                                                                                          | Philosophy of leadership, healthcare delivery systems, quality assurance, risk management, qualities of exceptional leaders                                                                                                                                                                                                                                                                    | 3b. Projects completed<br>4b. 8 projects completed with patient and organisational benefits e.g. Decreased procedure and hospitalisation times                                                                                                                                                                                                                                                                                                                                                                        | n/a       | 9            |
| Foster, 2008 [56]           | Single US medical centre                                        | 12                                        | Residents                                                                                                                                 | 2 years                     | 3 week intensive orientation, 11 month MPH degree and leadership coursework, weekly 1/2 day didactic sessions, monthly journal club, monthly open evening sessions     | MPH degree, leadership coursework change project, mentoring                                                                                                                                            | Leadership of small systems in health care<br>Measurement of illness burden in individuals and populations<br>Measurement of the outcomes of health service interventions,<br>Leadership of change for improvement of quality, value, and safety of health care of individuals and populations<br>Reflection on personal professional practice enabling personal and professional development. | 2b. Participants reported increased confidence across a range of key curriculum areas<br>3a. Participants reported the programme had helped them to gain new leadership roles, and that they had applied learning from the programme in their new leadership roles;<br>4a. Of those that acquired a new leadership opportunity, 100% of respondents reported participating in the leadership academy program had an impact on their success within the newly acquired leadership role(s).                             | n/a       | 9            |
| Freeman, 2018 [57]          | Single US training programme                                    | 30                                        | Cardiology fellows-in-training and early career professionals                                                                             | 2 years                     | 2 year cardiology leadership academy                                                                                                                                   | Mentoring, not otherwise clear                                                                                                                                                                         | Conflict management, team leadership, influencing others, navigating challenging conversations, and how to achieve work-life balance.                                                                                                                                                                                                                                                          | 2a. No change in knowledge in exposure or control. No difference in self-assessed change in self-assessed leadership scores compared with control (both had small increases in mean scores).<br>3b. Increase in observed performance on bespoke transactional and transformational scales (based on video recorded simulations, no control group)                                                                                                                                                                     | n/a       | 9            |
| Saravo, 2017 [58]           | Single German university hospital                               | 50                                        | Residents (PGY1-4 across specialties)                                                                                                     | 4 weeks                     | Weekly 2.5hr sessions after clinical duties (x4)                                                                                                                       | Didactic module, standardised simulations, one-on-one feedback on recorded simulations, "practicing communication techniques"                                                                          | "Full Range Leadership Model" (Bass); transactional and transformational leadership, simulation of critical incidents, communication techniques                                                                                                                                                                                                                                                | 1. 100% agree that project was a valuable learning experience (up from 56%)<br>2a. No significant change in attitude towards leadership<br>2b. Increased knowledge of the leadership values of the organisation (94% up from 47%)                                                                                                                                                                                                                                                                                     | n/a       | 9            |
| Schulz, 2013 [59]           | US surgical department specialty                                | 9                                         | Residents (ENT)                                                                                                                           | 6 months                    | Virtue strength assessments (VIA); mentorship meetings; 'thought of the day'; internal and external faculty training and development; leadership basic training course | Mentoring, interactive sessions mixed with reading, individual character assessment                                                                                                                    | Virtue Leadership, curriculum not otherwise specified                                                                                                                                                                                                                                                                                                                                          | 3b. 49 business plans were submitted over 13 courses.<br>4b. 30 of 49 business plans have been implemented                                                                                                                                                                                                                                                                                                                                                                                                            | n/a       | 9            |
| Stoller, 2007 [60]          | Single US hospital network                                      | Unclear (roughly 400)                     | Emerging physician-leaders                                                                                                                | 9 months                    | Eight sessions offered roughly once monthly on Fridays at an off-site retreat centre, Longitudinal project                                                             | Seminars, business case project                                                                                                                                                                        | Marketing in healthcare, Healthcare finance, Writing a business plan, Emotional intelligence, situational leadership, conflict resolution and negotiation, Medicolegal issues                                                                                                                                                                                                                  |                                                                                                                                                                                                                                                                                                                                                                                                                                                                                                                       | n/a       | 9            |

| Source (First Author, Year) | Setting                                                 | Learner Number  | Learner Type                                                                                                 | Intervention Length                            | Intervention Description                                                                                         | Teaching Methods                                                                                                                                                              | Educational Content                                                                                                                                                                                                                                                                                                                         | Main findings by Kirkpatrick level                                                                                                                                                                                                                                                                                                                                                                                                                                                                                                                                                                                                                                                                                                                                                                                                                                                                            | JBI Score | MERSQI Score |
|-----------------------------|---------------------------------------------------------|-----------------|--------------------------------------------------------------------------------------------------------------|------------------------------------------------|------------------------------------------------------------------------------------------------------------------|-------------------------------------------------------------------------------------------------------------------------------------------------------------------------------|---------------------------------------------------------------------------------------------------------------------------------------------------------------------------------------------------------------------------------------------------------------------------------------------------------------------------------------------|---------------------------------------------------------------------------------------------------------------------------------------------------------------------------------------------------------------------------------------------------------------------------------------------------------------------------------------------------------------------------------------------------------------------------------------------------------------------------------------------------------------------------------------------------------------------------------------------------------------------------------------------------------------------------------------------------------------------------------------------------------------------------------------------------------------------------------------------------------------------------------------------------------------|-----------|--------------|
| Wulfert, 2017 [61]          | German Master's Degree (Leadership in Medicine)         | 17              | Varied (2 senior consultants, 8 consultants, two senior residents, one pharmacist, one financial controller) | >100 days teaching time over a master's degree | Master's degree                                                                                                  | Project work, didactic teaching, discussions, thesis                                                                                                                          | Leadership and management, quality management and legal aspects, medical ethics, project management, empirical research methods, communication/dialogue skills, change management, diversity management, management accounting, health economics, medical engineering and computer science, education and didactics, educational management | 1. 14/17 participants completed the masters in full<br>3b. More than 30 projects implemented over the course of the masters.<br>4b. Projects successfully integrated into existing structures                                                                                                                                                                                                                                                                                                                                                                                                                                                                                                                                                                                                                                                                                                                 | n/a       | 9            |
| Blumenthal, 2014 [62]       | Single US hospital                                      | 16              | Residents (PGY2 Internal Med)                                                                                | 4 weeks                                        | 2:3hrs a week for 4 weeks, work between                                                                          | Large-group discussions case-studies, videos, role-plays small-group meetings homework/required readings                                                                      | Clinical leadership Goleman's leadership types and emotional intelligence authentic leadership effective team leadership Managing organizational change, making strategic decisions, assessing the dynamics of successful leaders, financial management, and finding life balance in a growing career.                                      | 1. Sessions perceived to be relevant<br>2a. Increased confidence, feeling more prepared for team challenges<br>2b. Self-reported learning, better understanding of personal strengths and weaknesses as a leader                                                                                                                                                                                                                                                                                                                                                                                                                                                                                                                                                                                                                                                                                              | 4         | 8.5          |
| Sanfey, 2011 [63]           | Single US university                                    | 143             | Academic faculty members who had demonstrated leadership potential within the school of medicine.            | 10 weeks                                       | 3 to 7 hour weekly training sessions over a 10-week period for an approximate total of 40 hours.                 | Instructional sessions, self-analysis using MBTI and the leadership skills inventory 360                                                                                      | Managing organizational change, making strategic decisions, assessing the dynamics of successful leaders, financial management, and finding life balance in a growing career.                                                                                                                                                               | Immediately post:<br>2a. 50% of participants indicated that their perspectives on leadership had changed as a result of the programme.<br>2b. For each leadership skill surveyed, the majority of participants agreed that it was improved by programme participation<br>3a. 81% of participants indicated that they had changed their professional behaviour as a result of the programme.<br>3b. 66% of respondents were invited to apply for or offered positions post-programme.<br>1-4 years post:<br>2a. Some respondents reported increased insight into others/self/job/leadership.<br>2b. Respondents reported increased ability to recognize weaknesses and strengths, and a range of other increased leadership skills.<br>3a. Only 27% of respondents reported changes in their behaviour, though 31% reported that they had been very successful in achieving their career goals.                | 2         | 8.5          |
| Edler, 2010 [64]            | Single US residency programme (paediatric anaesthetics) | Unclear         | Residents (first year paediatric anaesthetics residents)                                                     | 1 year                                         | 1 year administrative resident programme                                                                         | Reading, experiential learning, feedback, self-assessment, mentoring                                                                                                          | Organisation culture, human factors, quality assurance (QA) and continuous quality improvement (CQI), operating room scheduling, and resident selection, decision making, technical planning, interpersonal or professional actions, and conflict resolution                                                                                | 1. Qualitative report of satisfaction with the programme<br>2b. Report of improved conflict-management<br>3b. Observed application of leadership skills in programme improvement                                                                                                                                                                                                                                                                                                                                                                                                                                                                                                                                                                                                                                                                                                                              | 1         | 8.5          |
| Richman, 2001 [65]          | US/Canada executive education in academic medicine      | 200             | Midcareer female faculty at medical or dental schools at associate or full professor rank                    | 1 year                                         | Two week-long residential sessions (in September and April), annual conference, numerous assignments             | Lectures, panel discussions case studies, computer simulations, role playing, small group work, individual interviews and projects, extensive individual assessment, coaching | "mini-MBA, contemporary leadership issues, personal professional development (individual assessment tools, conflict management and negotiation skills, team-building skills)                                                                                                                                                                | 2a. Reports of improved confidence in addressing and resolving conflict situations. Insight and confidence into "how the game is played".<br>2b. Reports of improved knowledge in addressing and resolving conflict situations. Assessment showed significant and large increase in all curricular areas. (p<0.0001)<br>reports of increased knowledge of career possibilities, new insights into how to advance their own careers, and understanding of a greater range of options open for their pursuit. Increased awareness of educational and medical issues and development of strategies to be informed, resolve problems, and advance projects.<br>Understanding of new leadership and management strategies, allowing fellows to conceptualise, introduce, and implement ideas with greater effectiveness and confidence<br>3b. Fellows have been successful in advancing to higher leadership roles | 0         | 8.5          |
| Farver, 2016 [66]           | Single US hospital                                      | 105             | Residents (New Chief Residents)                                                                              | 2 days                                         | 2 day Chief Residents' Leadership Workshop                                                                       | Pre-workshop readings Workshop Post-workshop readings                                                                                                                         | Teambuilding Conflict Resolution Negotiation Emotional Intelligence Physician Health Mentoring Communication                                                                                                                                                                                                                                | 1. All workshops rated highly<br>2a. Confidence in team building increased<br>2b. Increased perceived ability to locate areas of need. Increased familiarity with workshop concepts.<br>3a. Self-reported increased ability to resolve conflict effectively                                                                                                                                                                                                                                                                                                                                                                                                                                                                                                                                                                                                                                                   | n/a       | 8.5          |
| Gregg, 2016 [67]            | Single US trauma centre                                 | 20              | Residents (Trauma, y3-5)                                                                                     | 6-30 months                                    | Evaluation of communication skills and weekly discussion at meetings                                             | Evaluation and feedback                                                                                                                                                       | Communication                                                                                                                                                                                                                                                                                                                               | 3b. Increase in observed communication/professionalism, systems-based practice, medical knowledge, practice-based learning, patient care                                                                                                                                                                                                                                                                                                                                                                                                                                                                                                                                                                                                                                                                                                                                                                      | n/a       | 8.5          |
| Hill, 2018 [68]             | Single US hospital                                      | 7               | Residents (senior surgery)                                                                                   | 3 weeks                                        | 3 week course with senior residents giving 5 presentations a week to juniors. Timing and frequency not specified | Presentations by participants to junior residents reflecting on readings from the course reading book                                                                         | Weekly readings from the book "the founding fathers on leadership"                                                                                                                                                                                                                                                                          | 3a. No statistically significant changes in survey results relating to behaviour with Bonferroni correction applied.                                                                                                                                                                                                                                                                                                                                                                                                                                                                                                                                                                                                                                                                                                                                                                                          | n/a       | 8.5          |
| Pugno, 2002 [69]            | US residency director program                           | "more than 300" | Residency directors (family practice). Numbers not specified                                                 | 9 months                                       | A three-day conference and two one-day sessions. Project work, mentoring                                         | Didactic and small-group sessions, project                                                                                                                                    | Leadership skills, personnel management and team building, program management, communication skills, negotiation skills, program finances, educational guidelines for family practice                                                                                                                                                       | 1. 99% of participants rated the programme valuable (15%) or very valuable (84%);<br>2a. Enhanced job satisfaction, reduced job stress, and an expanded network of educational contacts and resources.<br>4a. 76 % reported that the program lowered the level of stress. Participants reported enhanced job satisfaction, reduced job stress, and an expanded network of educational contacts and resources.<br>83% said they were more likely to continue as a program director for the next few years after the programme. The average tenure of family practice program directors has increased from 3 to 4 years before the programme, to more than 6 years after the programme had been running for 5 years.                                                                                                                                                                                            | n/a       | 8.5          |
| Denney, 2019 [70]           | Single UK deanery (South East Scotland)                 | 89              | Residents General Practice Specialty Trainee, Year 1)                                                        | 6 months                                       | Single session on leadership, recommended menu of possible experiences                                           | Guidance, formative feedback, encouragement to seek out specific leadership activities                                                                                        | Recommendations: chairing a meeting, "fresh pair of eyes" exercise NOS, running an educational session, practice leaflet project, clinical protocol, website design, mini-quality improvement project                                                                                                                                       | 2a. All trainees who completed the survey reported that development of leadership skills is either "quite important" or "very important" for a trainee's future career. 51% of trainees felt more involved in their GP practice as a result of their leadership activity.<br>2b. There was no significant change in the self-rated confidence in leadership skills or team working skills when compared pre-post.<br>3a. 83% of respondents reported having undertaken a voluntary leadership activity, particularly quality improvement projects and running educational sessions. Those who did not, frequently reported time and service delivery pressures as a reason.                                                                                                                                                                                                                                   | 5         | 8            |



| Source (First Author, Year) | Setting                                         | Learner Number   | Learner Type                                                                        | Intervention Length | Intervention Description                                                                                             | Teaching Methods                                                                                                                                                                                              | Educational Content                                                                                                                                                                                                                                                                                                                                                                              | Main findings by Kirkpatrick level                                                                                                                                                                                                                                                                                                                                                                                                                                                                                                                                                                                                                                                                                                                                                                                                                                                                                                         | JBI Score | MERSQI Score |
|-----------------------------|-------------------------------------------------|------------------|-------------------------------------------------------------------------------------|---------------------|----------------------------------------------------------------------------------------------------------------------|---------------------------------------------------------------------------------------------------------------------------------------------------------------------------------------------------------------|--------------------------------------------------------------------------------------------------------------------------------------------------------------------------------------------------------------------------------------------------------------------------------------------------------------------------------------------------------------------------------------------------|--------------------------------------------------------------------------------------------------------------------------------------------------------------------------------------------------------------------------------------------------------------------------------------------------------------------------------------------------------------------------------------------------------------------------------------------------------------------------------------------------------------------------------------------------------------------------------------------------------------------------------------------------------------------------------------------------------------------------------------------------------------------------------------------------------------------------------------------------------------------------------------------------------------------------------------------|-----------|--------------|
| McAlearney, 2005 [71]       | Single US hospital                              | 52               | Physicians (two cohorts)                                                            | 2 years             | 1hr monthly morning sessions, 1 half day session each 6 months                                                       | Adult learning. Interactive questions, case-based scenarios.                                                                                                                                                  | Decision making, problem solving, strategy, change, situational leadership, communication, negotiation, coaching and mentoring, conflict, finances                                                                                                                                                                                                                                               | 1. Mean score (/5) 4.7 for satisfaction, 4.8 for quality of information<br>2a. Mean score (/5) for perceived applicability 4.6. Mean confidence in strategic direction of the organisation 4.1<br>2b. Participants reported increased awareness of leadership resources(4.1), motivation to be involved in their community (3.7)<br>3a. Participants self-reported increased leadership effectiveness (4.2/5), teamwork (4.0) and team leading (4.3), as well as new roles (4.0). Participants reported using skills learned;<br>4a. Improved organisational collaboration towards strategic initiatives<br>2a. Participants reported increased self-awareness 2b. Demonstrated increased knowledge of authentic leadership concepts<br>3a. Self-reported long term (4 years) application of skills learned into clinical practice<br>4a. Participants reported improved performance for them and their teams as a result of the programme | 5         | 8            |
| Shah, 2013 [72]             | Single UK specialty training                    | 40               | Consultant ophthalmic surgeons                                                      | 2 days              | 2x full day interactive sessions                                                                                     | Gaming, team challenges, meta-planning, role play and professional actors, interactive presentations, and self-analysis                                                                                       | Admitting vulnerability and uncertainty, taking responsibility for managing risk, being self-aware and reflexive, internalising authentic leadership                                                                                                                                                                                                                                             | 2a. Participants reported increased self-awareness 2b. Demonstrated increased knowledge of authentic leadership concepts<br>3a. Self-reported long term (4 years) application of skills learned into clinical practice<br>4a. Participants reported improved performance for them and their teams as a result of the programme                                                                                                                                                                                                                                                                                                                                                                                                                                                                                                                                                                                                             | 2         | 8            |
| Clapp, 2018 [73]            | Single US hospital department                   | 36               | Residents and faculty (Department of Anaesthetic and Critical Care)                 | 1 year (presumed)   | 2x 2hr evening skills session, 1 half-day session and 1 2.5hr evening session "capstone"                             | Capstone: presentation on relevant topic small-group discussions presentations back to large group                                                                                                            | Feedback supporting colleagues during tough times clinical pedagogy                                                                                                                                                                                                                                                                                                                              | 1. 31% excellent, 44% very good, 25% good;<br>4a. "the frankness of the discussions between residents and attendings in these sessions has paved the way for a broader departmental initiative designed to facilitate more effective leadership and teamwork among individuals in all departmental roles—attendings, residents, nurse anaesthetists, administrative staff—through identifying the strengths and deficiencies of the ways in which they interact.<br>2a. Qualitative comments indicate more open attitude towards leadership roles<br>2b. Significant self-assessed increase in leadership knowledge.                                                                                                                                                                                                                                                                                                                       | 1         | 8            |
| Pettit, 2011 [74]           | Single US hospital department                   | 11 (9 responses) | Residents (Neurosurgery)                                                            | 1 year (academic)   | Monthly 1hr sessions                                                                                                 | Interactive lectures, self-assessment activities, case studies, self-reflection, discussions, and reading materials                                                                                           | Leadership style, conflict management, effective feedback, team building, team leadership, motivation, moving from peer to leader.                                                                                                                                                                                                                                                               | 2a. Qualitative comments indicate more open attitude towards leadership roles<br>2b. Significant self-assessed increase in leadership knowledge.                                                                                                                                                                                                                                                                                                                                                                                                                                                                                                                                                                                                                                                                                                                                                                                           | 1         | 8            |
| Donnelly, 2016 [75]         | Single US residency programme                   | Unclear          | Residents (radiology, PGY1-4)                                                       | 4 years             | 4 year residency programme in leadership fundamentals and leadership tracks. Monthly seminars over dinner (2-2.5hrs) | Monthly lectures for first 2 years, research work with imaging scientists, mentoring, project work                                                                                                            | Research, education, business/management, quality care/service, and information technology                                                                                                                                                                                                                                                                                                       | 1. "universal praise" from participants for the mandatory first 2 years, 100% opted into the optional years 3-4.<br>3b. 4 participants have worked on projects as part of the programme, with one having submitted academic manuscripts resulting from her project                                                                                                                                                                                                                                                                                                                                                                                                                                                                                                                                                                                                                                                                         | 0         | 8            |
| Gruver, 2006 [76]           | Single US health system                         | 17               | Physicians and non-physicians (finance, IT, nursing, public relations)              | 8 months            | Monthly seminars over dinner (2-2.5hrs)                                                                              | Case-based leadership discussions during two-hour sessions                                                                                                                                                    | Managing vs. Leading, forming a vision, predefining a person's moral compass, risk-taking and transactional leadership                                                                                                                                                                                                                                                                           | 1. High ratings for the course 4.63/5 for comparison to other leadership and education programmes experienced.<br>2a. Improved self-confidence in leadership, intended changes to leadership style<br>2b. Increased knowledge of desirable leadership characteristics in the organisation<br>3a. Several of the participants reported experimenting in their current leadership assignments with concepts discussed during a session; one participant used one of the cases to heighten the leadership awareness of some of his own subordinates. Reported personal bonds of participants with the CEO.<br>1. Satisfaction scores "between 3 and 4" on a four-point scale.<br>2b. Improvement in tested comprehension of the subject matter of each lecture, with an average increase of 20% to 40% between tests (5-point scale)                                                                                                          | 0         | 8            |
| Babitch, 2006 [77]          | Single US residency program (paediatrics)       | NR               | Residents (Paediatrics PGY1-3).                                                     | 9 months            | Nine sessions                                                                                                        | Lectures                                                                                                                                                                                                      | A core curriculum focusing on physician compensation, medical economics, healthcare system, leadership and communication, career/CVs, contracts, health law, and customer service                                                                                                                                                                                                                | 2b. Statistically significant increase in all 30 items related to knowledge and skills                                                                                                                                                                                                                                                                                                                                                                                                                                                                                                                                                                                                                                                                                                                                                                                                                                                     | n/a       | 8            |
| Gulati K, 2019 [78]         | Indian health care organisation                 | 96               | Clinicians and hospital administrators from public and private sector organisations | 3 days              | 3 day leadership residential programme as part of a 6 day residential programme                                      | Didactic lectures, small group workshops, focus group discussions, case-based discussions and experience sharing.                                                                                             | Leadership styles, leadership competencies, team building, strategic management, procurement, operational excellence, legal and ethical issues, budgeting, financial management, conflict management, quality and patient safety, hospital accreditation, communication, human resource development, health-care technology, contract management, hospital projects and supply chain management. | 2b. Statistically significant increase in all 30 items related to knowledge and skills                                                                                                                                                                                                                                                                                                                                                                                                                                                                                                                                                                                                                                                                                                                                                                                                                                                     | n/a       | 8            |
| Stoller, 2004 [79]          | Single US residency program (internal medicine) | 32               | Residents (PGY-1)                                                                   | 1 day               | One day retreat                                                                                                      | Group simulation exercise, group discussion                                                                                                                                                                   | Team skills, group dynamics, leadership                                                                                                                                                                                                                                                                                                                                                          | 1. All attendees rated the retreat as valuable.<br>2a. Based on significant changes in residents' responses on the postretreat questionnaire attendees believed that the retreat enhanced their abilities to be better physicians, resident supervisors, and leaders. (all p<0.001)<br>postretreat responses (table 3) indicated significant increases in agreement that good leaders challenge the process, make decisions based on shared vision, allow others to act, recognize individual contributions, and serve as good role models.                                                                                                                                                                                                                                                                                                                                                                                                | n/a       | 8            |
| Edmonstone, 2009 [80]       | Multiple UK strategic health authorities        | 200 (approx.)    | Senior medical leaders in primary and secondary care and public health              | 12 months           | Two 3-day residential modules at the beginning and end of the programme. Three interim event days.                   | Personal development plan, coaching, mentoring                                                                                                                                                                | Leadership for partnership<br>Personal development – through the creation of a personal development plan, provision of coaching, mentoring, etc.<br>Working in networks<br>Lateral thinking/scenario planning<br>Leading change                                                                                                                                                                  | 1. Participants dissatisfied with the programmes, partly due to high expectations not being met. Falloff in attendance<br>2a growing sense of identity as clinical leaders. Increased confidence.<br>2b. Greater appreciation of others' roles and perspectives<br>3a. Tools and skills applied in practice, increase in personal networking. 3b. Projects completed as part of the programmes.                                                                                                                                                                                                                                                                                                                                                                                                                                                                                                                                            | 5         | 7.5          |
| Steriopoulous, 2009 [81]    | Single Canadian residency program               | 52               | Residents (PGY2=24, PGY4=28)                                                        | 4 half days         | Workshops (four half-days)                                                                                           | Interactive teaching as much as possible. Didactic teaching and small groups or other interactive techniques (buzz groups, brain-storming, think-pair-share discussions, a debate, and clinical case studies) | Teamwork, conflict resolution, quality improvement, program planning and evaluation, leadership and change management, mental health reform, organizational structures, and self and career development                                                                                                                                                                                          | 1. Attendance averaged 54% overall. Workshops rated average of 4.2/5. Participants appreciated the reflective and interactive components of the workshops and valued the hands-on exercises and the use of case studies and "real life" examples. They suggested that more time be dedicated to quality improvement and medical error and opportunities to take part in administrative committees and quality improvement projects at their hospital sites. Focus requested on current efforts rather than historical overviews.<br>2b. Objectives related to skills and knowledge rated as met ("4/5 on Likert scale)                                                                                                                                                                                                                                                                                                                     | 2         | 7.5          |
| Berkenbosch, 2014 [82]      | Single Dutch university medical centre          | 14               | Residents (O&G, orthopaedics, paediatrics, internal medicine)                       | 8 hours             | 2 x 4 hour sessions 3 weeks apart with homework between                                                              | Didactic teaching/lectures student presentations simulation                                                                                                                                                   | Knowledge of the healthcare system time management                                                                                                                                                                                                                                                                                                                                               | 1. Rated 7.66/10, "it fills a gap in our current postgraduate medical training"<br>2a. Increased interest in leadership development<br>2b. No significant changes (underpowered)                                                                                                                                                                                                                                                                                                                                                                                                                                                                                                                                                                                                                                                                                                                                                           | 1         | 7.5          |
| Block, 2007 [83]            | 11 residency                                    | 146              | Residents (134)                                                                     | 2 days              | 2 day programme                                                                                                      | Experiential small-                                                                                                                                                                                           | Leadership competencies, self-awareness,                                                                                                                                                                                                                                                                                                                                                         | 1. High satisfaction scores of 6.2 on a scale of 1 to 7 (sd0.6)                                                                                                                                                                                                                                                                                                                                                                                                                                                                                                                                                                                                                                                                                                                                                                                                                                                                            | 0         | 7.5          |



| Source (First Author, Year) | Setting                                             | Learner Number                                      | Learner Type                                                   | Intervention Length | Intervention Description                                                        | Teaching Methods                                                                                                                                                       | Educational Content                                                                                                                                                                                                                                                                                                                                                                                                                                                                    | Main findings by Kirkpatrick level                                                                                                                                                                                                                                                                                                                                                                                                                                                                                                               | JBIScore | MERSQIScore |
|-----------------------------|-----------------------------------------------------|-----------------------------------------------------|----------------------------------------------------------------|---------------------|---------------------------------------------------------------------------------|------------------------------------------------------------------------------------------------------------------------------------------------------------------------|----------------------------------------------------------------------------------------------------------------------------------------------------------------------------------------------------------------------------------------------------------------------------------------------------------------------------------------------------------------------------------------------------------------------------------------------------------------------------------------|--------------------------------------------------------------------------------------------------------------------------------------------------------------------------------------------------------------------------------------------------------------------------------------------------------------------------------------------------------------------------------------------------------------------------------------------------------------------------------------------------------------------------------------------------|----------|-------------|
|                             | programs in Australia                               |                                                     | registrars and 12 resident medical officers)                   |                     |                                                                                 | group work, individual exercises, self-analysis questionnaires, videos, simulations, didactic content                                                                  | communication and learning styles, conflict resolution, serving as teacher, time management, delegation, leadership styles, managing stress, safety and quality, team building, feedback and action planning                                                                                                                                                                                                                                                                           | 2a. Reported desire to explore leadership and management in greater depth. Increased awareness that the transition to being registrar was more multifaceted than it may seem.                                                                                                                                                                                                                                                                                                                                                                    |          |             |
| Donaghy, 2018 [84]          | Single UK hospital trust                            | NR (>140)                                           | Specialty trainees ST4-ST8                                     | 10 months           | 14 sessions 90-120 minutes                                                      | Large group lectures discussion and reflection action learning (qi or patient safety) trainee presentations at workshops                                               | Medical leadership project management patient safety and QI methodology trust overview and patient client experience high performing teams human factors interview preparation clinical networks commissioning Leadership reasoning                                                                                                                                                                                                                                                    | 1. 100% of respondents would recommend step to a friend<br>2a. Improved confidence, intention to apply<br>2b. Improved understanding in a range of domains<br>3b. Completion of some qi projects                                                                                                                                                                                                                                                                                                                                                 | n/a      | 7.5         |
| Frugé, 2010 [85]            | Single US hospital department                       | 39                                                  | Residents (Paediatric Oncology)                                | NR                  | Twice-monthly seminar series                                                    | Guided reflection on challenging leadership experiences                                                                                                                | Leadership reasoning                                                                                                                                                                                                                                                                                                                                                                                                                                                                   | 1. 75% of fellows continue to participate in later years despite no longer being mandatory.<br>2a. Significant increase in confidence in all items on the bespoke questionnaire. Examples include working effectively as a team, effective communication, self-awareness.                                                                                                                                                                                                                                                                        | n/a      | 7.5         |
| Hunt, 2017 [86]             | Single US training camp                             | 30                                                  | Residents (Interns at the start of PGY1 surgery)               | NR                  | Surgical pgyl boot camp                                                         | Didactic material, narrated lectures, procedural videos, course manuals. Personality assessment. Non-leadership specific simulation Weekly three-hour evening sessions | Unclear                                                                                                                                                                                                                                                                                                                                                                                                                                                                                | 1. Participants agreed that the information was relevant to their future careers<br>2a. No significant increase in self-awareness (only 55% agree or strongly agree that understanding of own behaviours and motivators improved immediately post, only 40% agree or strongly agree at 3 months)                                                                                                                                                                                                                                                 | n/a      | 7.5         |
| Murdock, 2011 [87]          | Programme across 3 US states                        | >100 (not specified - 'five cohorts of 20 or more') | Community practice physicians (five cohorts)                   | 20-weeks            | Weekly three-hour evening sessions                                              | Weekly three-hour evening sessions                                                                                                                                     | The business of medicine, quality improvement, transformational leadership                                                                                                                                                                                                                                                                                                                                                                                                             | 2b. Increase in self-assessed competency in all the 26 categories in each of the program's five cohorts (significance not reported);<br>3a. Commentaries and assessments revealed an increasing level of empowerment in their leadership roles and increased desire for selection to leadership roles.                                                                                                                                                                                                                                           | n/a      | 7.5         |
| Thakur, 2018 [88]           | Single UK hospital trust                            | 23                                                  | Residents (PGY4-5 Psychiatry residents)                        | 1 year              | Six full day workshops; mentoring programme                                     | Case studies, role-play, exercises, reading, mentoring                                                                                                                 | Medical leadership competency framework (demonstrating personal qualities, working with others, managing services, improving services, setting direction)                                                                                                                                                                                                                                                                                                                              | 1. All workshops rated between 3-4/4<br>2a. Residents felt the programme helped them in achieving leadership competencies.<br>2b. Residents described how the conceptual issues learned in the workshops were reinforced with leadership champions and then applied to their projects<br>3b. Participants completed and presented projects at local medical education day.                                                                                                                                                                       | 5        | 7           |
| Patterson, 2013 [89]        | Single UK GP deanery (South Yorkshire Region)       | 8                                                   | Residents (GP trainees, PGY3)                                  | 8 months            | Facilitated leadership projects                                                 | Project work, personal reflections, facilitated monthly discussions                                                                                                    | Leadership, change management, and teamwork skills                                                                                                                                                                                                                                                                                                                                                                                                                                     | 1. Participants reported having enjoyed the programme<br>2a. Participants reported being inspired, feeling more mature as doctors.<br>2b. Increased self-awareness. In many domains there was a negative shift in self-assessment by the end of the programme - thought to be "re-calibration of confidence", supported by focus groups. Focus groups also reported learning around the difficulty of change management.<br>4: one participant was noted to have achieved change implementation through their project (not otherwise specified)  | 4        | 7           |
| Maza, 2016 [90]             | Single Israeli health provider                      | 256                                                 | Physician-managers                                             | 8 weeks             | 5 full days over 2 weeks with one overnight, followup meetings at 3 and 6 weeks | Theoretical knowledge, experiential learning, practical tools, deep personal exercises and simulations. Individual, dyadic, and group learning                         | Models of self-awareness, outcome thinking, determining a personal and organizational vision, and creating a personal approach to                                                                                                                                                                                                                                                                                                                                                      | 1. Mean rating of 5.7/6 (post) and 5.4/6 (retrospective)<br>2a. Respondents reported increased self-awareness, which was sustained at 6 months. (>5/6)<br>2b. Respondents reported increased personal leadership ability, sustained at 6 months. (5.2/6 then 4.9/6)<br>3a. Respondents reported increased proactivity in management.                                                                                                                                                                                                             | 3        | 7           |
| Steinert, 2003 [91]         | Single Canadian department                          | 16                                                  | Faculty (family medicine)                                      | 2 days              | Two-day workshop                                                                | Interactive modules and exercises                                                                                                                                      | Time management, goals and priorities, leadership styles and skills, and conducting effective meetings                                                                                                                                                                                                                                                                                                                                                                                 | 1. All participants rated workshop as "very useful".<br>2a. Several the participants reported that they would change their behaviour after the workshop, regarding time management, goals and meetings.<br>3a. Most respondents had successfully attempted determining short-term goals; handling paper more effectively; determining their 'prime time'; protecting time for specific tasks; and setting meeting agendas. They were less successful at: delegating; saying 'no'; adopting different leadership styles; and evaluating meetings. | 3        | 7           |
| Satiani, 2014 [92]          | Single US hospital department                       | 24                                                  | Surgeons who wish to assume administrative or leadership roles | 18 months           | 4hr seminar once a month                                                        | Seminars, project work (teams)                                                                                                                                         | Leadership competency, strategic planning and vision, financial management, business planning, communication skills, change management, quality of care and patient satisfaction, teambuilding, negotiation and problem-solving, stress/burnout and lifestyles issues, human resources and talent management, diversity for healthcare leaders, healthcare law, medical ethics                                                                                                         | 1. 100% of respondents would recommend the programme to peers<br>2a. Respondents reported increased confidence in leadership roles<br>2b. Respondents reported increased leadership skills, knowledge and self-awareness.<br>3a. Respondents reported using skills from the programme in their practice, and having made networks they otherwise would not have made.                                                                                                                                                                            | 2        | 7           |
| Lee, 2004 [93]              | Single US residency programme (paediatrics, Hawaii) | 10                                                  | Residents (PYG2)                                               | 3hrs                | 3-hour interactive workshop during resident retreat                             | Case scenarios, problem solving, role playing, interactive discussions and self-reflection                                                                             | Managing teams, leading residents, and working with different personalities.                                                                                                                                                                                                                                                                                                                                                                                                           | 1. written comments from workshop evaluation forms were "overwhelmingly positive".<br>2a. Resident confidence increased significantly for managing teams (p< 0.015), leading junior residents (p< 0.005) and leading group discussions (p< 0.017).<br>2b. Self-assessment of leadership skills also increased significantly (p< 0.043)                                                                                                                                                                                                           | 0        | 7           |
| Steiner, 2004 [94]          | Single US department of psychiatry                  | 13                                                  | Residents and post-doctoral fellows                            | 5 months            | 8 x 1.5h seminars                                                               | Seminars with guest speakers and case discussions                                                                                                                      | Exploration of leadership roles in research, clinical practice, teaching, and administration; organizational dynamics and gender; negotiation skills and conflict resolution strategies; role of consultation, seminars, peer support, and mentoring by both men and women in the development of leadership skills; "keeping the balance: work, relationships, and personal health." A "focused program" to train residents to have the capacity/ability to create and manage powerful | 1. Participants believed the course should be offered again and had a positive effect on their professional lives.<br>3a. One participant said it encouraged her to seek out mentors                                                                                                                                                                                                                                                                                                                                                             | 0        | 7           |
| Awad, 2004 [95]             | Single US residency program (surgery)               | NR                                                  | Residents (Surgical)                                           | 6 months            | NR                                                                              | Not specified                                                                                                                                                          | A "focused program" to train residents to have the capacity/ability to create and manage powerful                                                                                                                                                                                                                                                                                                                                                                                      | 2b. Statistically significant increase in score on a 34-item internal strength scorecard: alignment +13%, communication +12%, and integrity +12%.                                                                                                                                                                                                                                                                                                                                                                                                | n/a      | 7           |

| Source (First Author, Year) | Setting                                                        | Learner Number          | Learner Type                                             | Intervention Length       | Intervention Description                                                              | Teaching Methods                                                                                                                                   | Educational Content                                                                                                                                                                                                                                                                                                                                                                                                                                                                                                                                                                                                                                                                                                                                                                                                                                                                                                                                                              | Main findings by Kirkpatrick level                                                                                                                                                                                                                                                                                                                                                                                                                                                                                                                                                                                                          | JBI Score | MERSQI Score |
|-----------------------------|----------------------------------------------------------------|-------------------------|----------------------------------------------------------|---------------------------|---------------------------------------------------------------------------------------|----------------------------------------------------------------------------------------------------------------------------------------------------|----------------------------------------------------------------------------------------------------------------------------------------------------------------------------------------------------------------------------------------------------------------------------------------------------------------------------------------------------------------------------------------------------------------------------------------------------------------------------------------------------------------------------------------------------------------------------------------------------------------------------------------------------------------------------------------------------------------------------------------------------------------------------------------------------------------------------------------------------------------------------------------------------------------------------------------------------------------------------------|---------------------------------------------------------------------------------------------------------------------------------------------------------------------------------------------------------------------------------------------------------------------------------------------------------------------------------------------------------------------------------------------------------------------------------------------------------------------------------------------------------------------------------------------------------------------------------------------------------------------------------------------|-----------|--------------|
| Bayard, 2003 [96]           | Single US residency program (family medicine)                  | NR                      | Residents (Family Medicine PGY2-3).                      | 2 years                   | Nine half day sessions (first year), monthly one-hour sessions (second year)          | Interactive-lectures and group assignments                                                                                                         | teams through alignment, communication, and integrity<br>A practice management curriculum: Determining/balancing personal and professional goals, practice opportunities, facilities, organization, operation and management. Staff policies, legal issues, marketing, resources and hospital issues                                                                                                                                                                                                                                                                                                                                                                                                                                                                                                                                                                                                                                                                             | 1. Reported that the course was beneficial, a positive experience.<br>2a. Reported increased interest (and knowledge) in practice management<br>2b. Self-reported knowledge/comp fit with each of 13 practice management topics increased by roughly 2 points (five point Likert scale)                                                                                                                                                                                                                                                                                                                                                     | n/a       | 7            |
| Hanna, 2012 [97]            | Single Canadian hospital                                       | 43                      | Residents (PGY3-6 Surgery)                               | 1 day                     | One-day conference                                                                    | Interactive lectures and case-based discussions; role-play, scenario simulation, small-group problem-solving sessions, and live feedback sessions. | Giving feedback and delegating duties, building teamwork, managing time, making rounds, coping with stress, effective learning while on duty, teaching at bedside and in the OR, and managing conflicts.<br>Negotiating employment, managing personal finances, hedging malpractice risk, and managing a private practice<br>Leadership NOS                                                                                                                                                                                                                                                                                                                                                                                                                                                                                                                                                                                                                                      | 1. 79% felt that management was well-addressed or very well-addressed cf. 5% before the course<br>2a. Statistically significant improvement on perceived preparedness for all 4 managerial duties (negotiating employment, managing personal finances, hedging malpractice risk, managing a private practice) 2b. Participants reported improved skills in giving feedback, delegating duties, coping with stress, effective learning, and effective teaching. These were not significant with Bonferroni correction applied.                                                                                                               | n/a       | 7            |
| Patel, 2019 [98]            | Single US hospital residency                                   | 17                      | Residents (PGY1-2)                                       | 2 years                   | Quarterly mentoring meetings for 2 years as part of a healthcare leadership programme | Mentoring                                                                                                                                          | Advanced cardiovascular life support leadership, equipment management, and cardiac rhythm recognition and management.<br>Organizational leadership, financial management, management strategy, applied skills and tools                                                                                                                                                                                                                                                                                                                                                                                                                                                                                                                                                                                                                                                                                                                                                          | 1. Participants rated their likelihood of recommending the programme at 7.8/10 (10 being extremely likely);<br>2a. Confidence seemed to increase (limited data reported)<br>2b. Gained confidence in time management, negotiation and leadership skills                                                                                                                                                                                                                                                                                                                                                                                     | n/a       | 7            |
| Stefan, 2011 [99]           | Single US hospital                                             | 24                      | Residents (Senior)                                       | 4 weeks                   | Weekly 1hr simulation sessions                                                        | Lecture, briefing, simulations, reflections                                                                                                        | Advanced cardiovascular life support leadership, equipment management, and cardiac rhythm recognition and management.<br>Organizational leadership, financial management, management strategy, applied skills and tools                                                                                                                                                                                                                                                                                                                                                                                                                                                                                                                                                                                                                                                                                                                                                          | 1. "more than half of the participants considered the program to be beneficial";<br>2a. Overall self-confidence score improved from 2.8 to 3.9                                                                                                                                                                                                                                                                                                                                                                                                                                                                                              | n/a       | 7            |
| Gagliano, 2010 [100]        | Single US hospital                                             | 90                      | Physicians with leadership responsibilities              | 2 years                   | Monthly sessions of 2-4 hours                                                         | Lectures and case-based discussion                                                                                                                 | Advanced cardiovascular life support leadership, equipment management, and cardiac rhythm recognition and management.<br>Organizational leadership, financial management, management strategy, applied skills and tools                                                                                                                                                                                                                                                                                                                                                                                                                                                                                                                                                                                                                                                                                                                                                          | 1. Participants reported high satisfaction with the course, and most would recommend to colleagues.<br>2a. Participants reported feeling more interested in and prepared for leadership responsibilities.<br>3a. 79% of participants reported having changed their approaches to projects or problems as a result of the course.                                                                                                                                                                                                                                                                                                            | 2         | 6.5          |
| Gurrera, 2014 [101]         | Single US hospital                                             | 8                       | Residents                                                | 5 months                  | 1hr per week sessions for 5 months; team project                                      | Didactic teaching, team projects                                                                                                                   | (1) overview of course; explanation of business plan project and expectations; resident interest survey;<br>(2) organization and leadership models;<br>(3) strategic planning;<br>(4) the learning organization;<br>(5) leadership/organizational ethics;<br>(6) risk management;<br>(7) marketing—part 1;<br>(8) marketing—part 2;<br>(9) decision-making;<br>(10) lean management—part 1;<br>(11) lean management—part 2;<br>(12) QA processes and measures;<br>(13) business plan workshop;<br>(14) healthcare delivery systems;<br>(15) microeconomics/ accounting;<br>(16) medical errors/safety—part 1;<br>(17) medical errors/ safety—part 2;<br>(18) presentation of business plans.<br>Team dynamics<br>leading change<br>business of medicine<br>communication skills<br>Leadership (personal qualities)<br>Effective services (managing services), acting in a team (working with others), direction setting<br>enabling improvement (improving services, reflection) | 1. Participants enjoyed the course and found it interesting<br>2b. Self-reported new knowledge. Self-reported reassessment of own personal skills<br>3a. Self-reported improved interpersonal skills and decision making                                                                                                                                                                                                                                                                                                                                                                                                                    | 0         | 6.5          |
| Bhatia, 2015 [102]          | Single US institution                                          | 20                      | Residents (Internal medicine, surgery, emergency, >PGY2) | 1 week                    | 1 week programme                                                                      | Case-based learning<br>interactive talks<br>small-group sessions<br>simulation<br>Evaluation and feedback                                          | Team dynamics<br>leading change<br>business of medicine<br>communication skills<br>Leadership (personal qualities)<br>Effective services (managing services), acting in a team (working with others), direction setting<br>enabling improvement (improving services, reflection)                                                                                                                                                                                                                                                                                                                                                                                                                                                                                                                                                                                                                                                                                                 | 1. All topics rated >8/10                                                                                                                                                                                                                                                                                                                                                                                                                                                                                                                                                                                                                   | n/a       | 6.5          |
| Hadley, 2015 [103]          | Single UK deanery                                              | NR (549 forms analysed) | Residents (FY2 doctors)                                  | Single brief intervention | Leadership assessment and feedback                                                    | Evaluation and feedback                                                                                                                            | Team dynamics<br>leading change<br>business of medicine<br>communication skills<br>Leadership (personal qualities)<br>Effective services (managing services), acting in a team (working with others), direction setting<br>enabling improvement (improving services, reflection)                                                                                                                                                                                                                                                                                                                                                                                                                                                                                                                                                                                                                                                                                                 | 2b. 60% of participants felt that their leadership skills had improved as a result of the feedback received                                                                                                                                                                                                                                                                                                                                                                                                                                                                                                                                 | n/a       | 6.5          |
| Kasuya, 2001 [104]          | Single US residency program (internal medicine)                | NR                      | Residents (PGY1).                                        | 1 day                     | Six-hour retreat                                                                      | Lectures and small-group tasks and discussions, scenarios and role play                                                                            | Setting personal vision, leadership vs. management, building a team, practical negotiation skills, providing effective feedback, and problem-solving as a team leader                                                                                                                                                                                                                                                                                                                                                                                                                                                                                                                                                                                                                                                                                                                                                                                                            | 2a. Increased confidence in their abilities to lead a ward team (p = .0002) and fulfil their responsibilities as upper-level residents (p = .0002) and felt better prepared to deal with the challenges of being upper-level residents (mean = 3.65, SD .61). The participants also believed that they would use what they learned at this retreat as upper-level residents (mean = 3.88, SD .33).<br>2b. Reported having identified qualities they aspired to as upper-level residents (p = .0014). They also reported that as a result of the retreat they better appreciated their roles as team leader and manager (mean =3.76, SD .44) | n/a       | 6.5          |
| Ninan, 2018 [105]           | Single US Residency programme                                  | NR                      | Residents (Anaesthesia)                                  | 1 year                    | Monthly 1hr didactic sessions                                                         | Didactic teaching, assignment                                                                                                                      | Personal branding, curriculum vitae, marketing, networking, evaluating and evaluating different types of medical practice, medical staff structure, governance, healthcare reform, future trends in medicine                                                                                                                                                                                                                                                                                                                                                                                                                                                                                                                                                                                                                                                                                                                                                                     | Not possible to reliably infer due to poor quality reporting.<br>1. Junior residents expressed frustration that the program was taking them away from their clinical studies. Senior residents did not express this.<br>2a. Possible increase in knowledge across course objectives (no statistical analysis)<br>3a. Reported increase in quality improvement project involvement, scholarly production and networking behaviours, though the methods for this were not reported                                                                                                                                                            | n/a       | 6.5          |
| Schwartz, 2014 [106]        | International (US and Canada) Psychiatry leadership conference | 541                     | Residents (all US and Canadian residency programmes)     | 3 days                    | 3-day immersion course                                                                | Large and small group sessions, group tasks, peer and teacher feedback                                                                             | Psychological challenges in leadership situations, personal conflicts, self-reflection and self-awareness, group process, conflict resolution, navigation of challenging leadership roles                                                                                                                                                                                                                                                                                                                                                                                                                                                                                                                                                                                                                                                                                                                                                                                        | 1. Respondents found the feedback they had received to have been helpful (89%)<br>2a. Respondents reported improved understanding of group process and self-awareness<br>2b. Respondents reported improved leadership confidence and willingness to use conflict resolution skills and increased interest in pursuing leadership roles.                                                                                                                                                                                                                                                                                                     | n/a       | 6.5          |
| Ennis-Cole, 2018 [107]      | Single US hospital                                             | 10                      | Physicians NOS                                           | 6 months                  | 2hrs once a fortnight                                                                 | Multi-source feedback,                                                                                                                             | Communication, development and learning,                                                                                                                                                                                                                                                                                                                                                                                                                                                                                                                                                                                                                                                                                                                                                                                                                                                                                                                                         | 1. The attendance rate was 86% and the graduation rate was 96%.                                                                                                                                                                                                                                                                                                                                                                                                                                                                                                                                                                             | 3         | 6            |

| Source (First Author, Year) | Setting                                      | Learner Number                   | Learner Type                                                  | Intervention Length | Intervention Description                                                                                  | Teaching Methods                                                                                                                                                                                                                                                                              | Educational Content                                                                                                                                                                                                                                              | Main findings by Kirkpatrick level                                                                                                                                                                                                                                                                                                                                                                                                                         | JBI Score | MERSQI Score |
|-----------------------------|----------------------------------------------|----------------------------------|---------------------------------------------------------------|---------------------|-----------------------------------------------------------------------------------------------------------|-----------------------------------------------------------------------------------------------------------------------------------------------------------------------------------------------------------------------------------------------------------------------------------------------|------------------------------------------------------------------------------------------------------------------------------------------------------------------------------------------------------------------------------------------------------------------|------------------------------------------------------------------------------------------------------------------------------------------------------------------------------------------------------------------------------------------------------------------------------------------------------------------------------------------------------------------------------------------------------------------------------------------------------------|-----------|--------------|
|                             |                                              |                                  |                                                               |                     | for 6 months (24hrs total)                                                                                | "insights" self-assessment and professional debrief, mentoring, classroom session, book club, reading, journaling, self-coaching, executive coaching edit: instructor led classes, assigned readings, self-directed learning via a binder resource guide, case studies and online experiences | management and planning, relationship and team building, innovation and change, and patient centricity.                                                                                                                                                          | 2b. Participants reported increased team-building skills<br>3a. Participants reported daily implementation of skills learned                                                                                                                                                                                                                                                                                                                               |           |              |
| Steinhardt, 2015 [108]      | Single US hospital                           | NR                               | Residents (GPGY4 Obstetrics and Gynaecology)                  | 2.5 hours           | 2.5 hour workshop delivered by midwives                                                                   | Roleplay, reflection, discussion, games                                                                                                                                                                                                                                                       | Principles of leadership, innovation, creative problem solving, and communication techniques                                                                                                                                                                     | 1. "nearly 100% numerical rating of 5"<br>2b. Participants reported improved insight into self and team<br>3a. Participants reported increased ability to be confident and vulnerable as a leader                                                                                                                                                                                                                                                          | 3         | 6            |
| Torbeck, 2018 [109]         | Single US academic department                | Unclear                          | Academic Faculty (New faculty up to senior leadership/chairs) | 3 to 12 months      | Four related programs for respectively new faculty, junior faculty, junior leadership, senior leadership. | Action learning, small group discussions, case scenarios, assignments, reflection exercises, multisource feedback, executive coaching (depending on which tier of the programme)                                                                                                              | Leadership, communication, strategic planning, negotiation and conflict management, marketing, change, creating vision, managing difficult people, emotional intelligence, finances                                                                              | 1. Only 20% of faculty attended basic programme. Overall reaction post-session was positive to extremely positive.<br>3a. Participants noted in assignments that they had applied learning from the programme into their day to day work. 3b. Multiple participants interviewed for a leadership position.                                                                                                                                                 | 2         | 6            |
| Vimr, 2013 [110]            | Single Canadian hospital                     | 29                               | Physician leaders.                                            | 8 months            | Five 1.5 day meetings over 8 months                                                                       | Multi-source feedback, self-reflection, readings, action learning projects, coaching                                                                                                                                                                                                          | Alignment of competencies, a systems and collaborative approach, affective learning strategies                                                                                                                                                                   | 1. "average rating for all components was 4.64 on a 6.0-point Likert scale". Components were not specified, nor the anchors of the Likert scale.<br>2a. Comments cited increased awareness and understanding of leadership principles.<br>2b. Increased understanding of different leadership roles, accountabilities, and approaches.<br>3b. Some of the individuals from the first cohort continued to work with their coach after the program was over. | 2         | 6            |
| Bircher, 2013 [111]         | Single UK deanery (extension of GP training) | NR                               | Residents (GP trainees)                                       | 2 years             | Unspecified number of programme days                                                                      | Didactic teaching, online learning environment, supervision, project work as individuals                                                                                                                                                                                                      | The content was guided by the medical leadership competency framework, which includes domains of (1) delivering the service, (2) demonstrating personal qualities, (3) working with others, (4) managing services, (5) improving services, (6) setting direction | 2a. Increased confidence in having difficult conversations 3a. Participants reported improved time management and application of skills learnt                                                                                                                                                                                                                                                                                                             | 0         | 6            |
| Kochar, 2003 [112]          | Single US academic medical centre            | 30                               | Faculty members                                               | 5 months            | 72hours - Nine-day course in three-day segments over five months                                          | Sessions, lectures                                                                                                                                                                                                                                                                            | Managing people, health care finance and accounting, leadership, marketing, health care informatics and information technology, health care quality, health care economics, time management                                                                      | 1. Overall course rated 4.6 out of 5<br>3b. Examples of cross-departmental collaboration have been seen.                                                                                                                                                                                                                                                                                                                                                   | 0         | 6            |
| Biese, 2011 [113]           | Single US hospital department                | NR                               | Residents (Senior Residents, Emergency Medicine)              | 1 year              | Programme restructure to allocate leadership roles                                                        | Residents are allocated a leadership role in their final year of residency                                                                                                                                                                                                                    | Roles in: Administrative Chief, Resident Education, Resident Research, Journal Club, Medical Student Education, Ultrasonography Education, Resident Reading, Simulation, Information Technology                                                                  | 1. 100% of chiefs felt that the new system allowed the residency to meet more of its goals. All participants said they would recommend their position to other residents<br>2a. 100% felt their experience encouraged them to seek future leadership roles<br>3a. 100% felt their experience contributed to them deciding to enter academics.                                                                                                              | n/a       | 6            |
| Cherry, 2010 [114]          | Single US university                         | 141                              | Junior faculty                                                | 9 months            | Two hours per week                                                                                        | Didactic classroom discussions, expert panel presentations, interactive case-based learning, group exercises, skill enhancement workshops, individual project with supervision                                                                                                                | Setting goals, mentoring, negotiation and conflict resolution, performance review and compensation, presentation skills, facilitation, teaching, feedback, communication                                                                                         | 1. Participants reported high satisfaction with the programs and with their mentor pairings<br>2b. Participants reported enhanced skills related to initiating and negotiating a new mentoring relationship<br>3b. "the project...often results in one or more scholarly products for the individual"                                                                                                                                                      | n/a       | 6            |
| Johnson, 2014 [115]         | Single US hospital department                | Unclear (16 responses to survey) | Residents (Senior medical residents)                          | 1/2 day             | 3hr seminar focussed on emotional intelligence                                                            | Readings, formalized presentation, analysis of videos, role-play                                                                                                                                                                                                                              | Emotional Intelligence                                                                                                                                                                                                                                           | 1. Seminar was felt by participants to have provided relevant content                                                                                                                                                                                                                                                                                                                                                                                      | n/a       | 6            |
| O'Donnell, 2011 [116]       | Single US hospital (residency programs)      | NR                               | Residents (PGY1). Numbers not specified                       | 4 weeks             | Compulsory first year resident rotation in case management with 2hrs/week for 4 weeks                     | Lectures, discussions, case presentations                                                                                                                                                                                                                                                     | Overview of case management, advocacy, communication, and resource management                                                                                                                                                                                    | 1. Evaluation broadly positive (>90% agreement with 6 statements).<br>2b. They acknowledge the case managers for their expertise, better understand utilization management, compliance, and coordination of care as a team and how this knowledge has also assisted them in their understanding of the continuum of care and regulations.                                                                                                                  | n/a       | 5.5          |
| Ringdahl, 2014 [117]        | Single US residency programme                | 36                               | Residents (Family medicine, PGY1-3)                           | NR                  | Unclear                                                                                                   | Networking, mentoring, role play, simulations, discussions                                                                                                                                                                                                                                    | Awareness of leadership opportunities, understanding organizational dynamics, conflict resolution, negotiation skills, mentoring, and personal wellness.                                                                                                         | 1. Feedback from participants has been uniformly positive                                                                                                                                                                                                                                                                                                                                                                                                  | n/a       | 5            |

Supplementary Table 1: Summary of included studies. NR= Not Reported; NOS=Not Otherwise Specified; n/a=not applicable. MERSQI=Medical Education Research Study Quality Instrument; JBI=Joanna Briggs Institute Critical Appraisal Checklist for Qualitative Research.

**References:**

- 1 Boyle DK, Kochinda C. Enhancing Collaborative Communication of Nurse and Physician Leadership in Two Intensive Care Units. *J Nurs Adm* 2004;34:60–70. doi:10.1097/00005110-200402000-00003
- 2 Parsons JR, Crichlow A, Ponnuru S, et al. Filling the Gap: Simulation-based Crisis Resource Management Training for Emergency Medicine Residents. *West J Emerg Med* 2018;19:205–10. doi:https://dx.doi.org/10.5811/westjem.2017.10.35284
- 3 Cooper S. Developing leaders for advanced life support: evaluation of a training programme. *Resuscitation* 2001;49:33–8. doi:10.1016/S0300-9572(00)00345-2
- 4 Malling B, Mortensen L, Bonderup T, et al. Combining a leadership course and multi-source feedback has no effect on leadership skills of leaders in postgraduate medical education. An intervention study with a control group. *BMC Med Educ* 2009;9:72. doi:10.1186/1472-6920-9-72
- 5 von Vultée PJ, Arnetz B. The impact of management programs on physicians' work environment and health: A prospective, controlled study comparing different interventions. *J Health Organ Manag* 2004;18:25–37. doi:10.1108/14777260410532047
- 6 Fassiotto M, Maldonado Y, Hopkins J. A long-term follow-up of a physician leadership program. *J Health Organ Manag* 2018;32:56–68. doi:10.1108/JHOM-08-2017-0208
- 7 Levine SA, Chao SH, Brett B, et al. Chief resident immersion training in the care of older adults: An innovative interspecialty education and leadership intervention. *J Am Geriatr Soc* 2008;56:1140–5. doi:10.1111/j.1532-5415.2008.01710.x
- 8 Hopkins J, Fassiotto M, Ku MC, et al. Designing a physician leadership development program based on effective models of physician education. *Health Care Manage Rev* 2018;43:293–302. doi:10.1097/HMR.0000000000000146
- 9 Dannels SA, Yamagata H, McDade SA, et al. Evaluating a leadership program: A comparative, longitudinal study to assess the impact of the Executive Leadership in Academic Medicine (ELAM) program for women. *Acad Med* 2008;83:488–95. doi:10.1097/ACM.0b013e31816be551
- 10 Orme D, Campbell C. How leadership training saves money 'service line leadership' at Nottingham University Hospitals. *BMJ Lead* 2019;3:29–36. doi:10.1136/leader-2018-000132
- 11 Cole DC, Giordano CR, Vasilopoulos T, et al. Resident Physicians Improve Nontechnical Skills When on Operating Room Management and Leadership Rotation. *Anesth Analg* 2017;124:300–7. doi:10.1213/ANE.0000000000001687
- 12 Haftel HM, Swan R, Anderson MS, et al. Fostering the Career Development of Future Educational Leaders: The Success of the Association of Pediatric Program Directors Leadership in Educational Academic Development Program. *J Pediatr* 2018;194:5-6.e1. doi:10.1016/j.jpeds.2017.11.066
- 13 Ten Have ECM, Nap RE, Tulleken JE. Quality improvement of interdisciplinary rounds by leadership training based on essential quality indicators of the Interdisciplinary Rounds Assessment Scale. *Intensive Care Med* 2013;39:1800–7. doi:10.1007/s00134-013-3002-0
- 14 Gilfoyle E, Gottesman R, Razack S. Development of a leadership skills workshop in paediatric advanced resuscitation. *Med Teach* 2007;29:e276–83. doi:10.1080/01421590701663287
- 15 LoPresti L, Ginn P, Treat R. Using a simulated practice to improve practice management learning. 2009.

- 16 Wurster AB, Pearson K, Sonnad SS, *et al.* The Patient Safety Leadership Academy at the University of Pennsylvania: The First Cohort's learning experience. *Qual Manag Health Care* 2007;16:166–73. doi:10.1097/01.QMH.0000267454.63123.e7
- 17 Pradarelli JC, Jaffe GA, Lemak CH, *et al.* A leadership development program for surgeons: First-year participant evaluation. *Surgery* 2016;160:255–63. doi:https://dx.doi.org/10.1016/j.surg.2016.03.011
- 18 Throgmorton C, Mitchell T, Morley T, *et al.* Evaluating a physician leadership development program - a mixed methods approach. *J Health Organ Manag* 2016;30:390–407. doi:https://dx.doi.org/10.1108/JHOM-11-2014-0187
- 19 Bergman D, Fransson-Sellgren S, Wahlstrom R, *et al.* Healthcare leadership: Impact of short-term intensive and long-term less intensive training programmes. *Leadersh Heal Serv* 2009;22:161–75. doi:10.1108/17511870910953805
- 20 Monkhouse A, Sadler L, Boyd A, *et al.* The Improving Global Health fellowship: A qualitative analysis of innovative leadership development for NHS healthcare professionals. *Global Health* 2018;14:69. doi:10.1186/s12992-018-0384-3
- 21 Tsoh JY, Kuo AK, Barr JW, *et al.* Developing faculty leadership from 'within': a 12-year reflection from an internal faculty leadership development program of an academic health sciences center. *Med Educ Online* 2019;24:1567239. doi:10.1080/10872981.2019.1567239
- 22 Bearman M, O'Brien R, Anthony A, *et al.* Learning surgical communication, leadership and teamwork through simulation. *J Surg Educ* 2012;69:201–7. doi:10.1016/j.jsurg.2011.07.014
- 23 Carney PA, Eiff MP, Green LA, *et al.* Transforming Primary Care Residency Training: A Collaborative Faculty Development Initiative among Family Medicine, Internal Medicine, and Pediatric Residencies. *Acad Med* 2015;90:1054–60. doi:10.1097/ACM.0000000000000701
- 24 Cooper JB, Singer SJ, Hayes J, *et al.* Design and evaluation of simulation scenarios for a program introducing patient safety, teamwork, safety leadership, and simulation to healthcare leaders and managers. *Simul Healthc* 2011;6:231–8. doi:10.1097/SIH.0b013e31821da9ec
- 25 Agius SJ, Brockbank A, Baron R, *et al.* The impact of an integrated medical leadership programme. *J Heal Organ Manag* 2015;29:39–54. doi:10.1108/JHOM-09-2013-0188
- 26 Mckimm J, Hickford D, Lees P, *et al.* Evaluating the impact of a national clinical leadership fellow scheme. *BMJ Lead* 2019;3:37–42. doi:10.1136/leader-2019-000135
- 27 Cohen D, Vlaev I, McMahon L, *et al.* The Crucible simulation: Behavioral simulation improves clinical leadership skills and understanding of complex health policy change. *Health Care Manage Rev* 2017;44:246–55. doi:10.1097/HMR.0000000000000162
- 28 Ruston A, Tavabie A. Fostering clinical engagement and medical leadership and aligning cultural values: An evaluation of a general practice specialty trainee integrated training placement in a primary care trust. *Qual Prim Care* 2010;18:263–8.
- 29 Hackworth J, Steel S, Cooksey E, *et al.* Faculty Members' Self-Awareness, Leadership Confidence, and Leadership Skills Improve after an Evidence-Based Leadership Training Program. *J. Pediatr.* 2018;199:4-6.e2. doi:10.1016/j.jpeds.2018.05.007
- 30 Al-Mutawa N, Elmahdi H, Joyce P. The implementation of a practice management programme for family medicine residents in Qatar. *Educ Prim Care* 2016;27:380–5. doi:10.1080/14739879.2016.1219620
- 31 Fernandez CSP, Noble CC, Jensen ET, *et al.* Improving Leadership Skills in Physicians: A 6-Month Retrospective Study. *J Leadersh Stud* 2016;9:6–19. doi:10.1002/jls.21420

- 32 Chang A, Lundebjerg NE, Abrams J, *et al.* Leadership, Inside and Out: The Tideswell-AGS-ADGAP Emerging Leaders in Aging Program. *J Am Geriatr Soc* 2019;67:437–42. doi:10.1111/jgs.15702
- 33 Day CS, Tabrizi S, Kramer J, *et al.* Effectiveness of the AAOS leadership fellows program for orthopaedic surgeons. *J Bone Jt Surg - Ser A* 2010;92:2700–8. doi:10.2106/JBJS.J.00272
- 34 Korschun HW, Redding D, Teal GL, *et al.* Realizing the vision of leadership development in an academic health center: The Woodruff Leadership Academy. *Acad Med* 2007;82:264–71. doi:10.1097/ACM.0b013e31803078b5
- 35 McDade SA, Richman RC, Jackson GB, *et al.* Effects of Participation in the Executive Leadership in Academic Medicine (ELAM) Program on Women Faculty's Perceived Leadership Capabilities. *Acad Med* 2004;79:302–9. doi:10.1097/00001888-200404000-00005
- 36 Edmonstone J. The development of strategic clinical leaders in the National Health Service in Scotland. *Leadersh Heal Serv* 2011;24:337–53. doi:10.1108/17511871111172376
- 37 MacPhail A, Young C, Ibrahim JE. Workplace-based clinical leadership training increases willingness to lead: Appraisal using multisource feedback of a clinical leadership program in regional Victoria, Australia. *Leadersh Heal Serv* 2015;28:100–18. doi:10.1108/LHS-01-2014-0002
- 38 Cerrone SA, Adelman P, Akbar S, *et al.* Using objective structured teaching encounters (OSTEs) to prepare chief residents to be emotionally intelligent leaders. *Med Educ Online* 2017;22:1320186. doi:10.1080/10872981.2017.1320186
- 39 Patel N, Brennan PJ, Metlay J, *et al.* Building the pipeline: The creation of a residency training pathway for future physician leaders in health care quality. *Acad Med* 2015;90:185–90. doi:10.1097/ACM.0000000000000546
- 40 Nakanjako D, Namagala E, Semeere A, *et al.* Global health leadership training in resource-limited settings: A collaborative approach by academic institutions and local health care programs in Uganda. *Hum Resour Health* 2015;13:87. doi:10.1186/s12960-015-0087-2
- 41 Kuo AK, Thyne SM, Chen HC, *et al.* An innovative residency program designed to develop leaders to improve the health of children. *Acad Med* 2010;85:653. doi:10.1097/ACM.0b013e318181eb60f6
- 42 Brandon CJ, Mullan PB. Teaching Medical Management and Operations Engineering for Systems-Based Practice to Radiology Residents. *Acad Radiol* 2013;20:345–50. doi:10.1016/j.acra.2012.09.025
- 43 Green PL, Plsek PE. Coaching and leadership for the diffusion of innovation in health care: A different type of multi-organization improvement collaborative. *Jt Comm J Qual Improv* 2002;28:55–71. doi:10.1016/S1070-3241(02)28006-2
- 44 Hemmer PR, Karon BS, Hernandez JS, *et al.* Leadership and management training for residents and fellows: A curriculum for future medical directors. *Arch Pathol Lab Med* 2007;131:610–4. doi:10.1043/1543-2165(2007)131[610:LAMTFR]2.0.CO;2
- 45 McCurdy FA, Beck G, Maroon A, *et al.* The administrative colloquium: Developing management and leadership skills for faculty. *Ambul Pediatr* 2004;4:124–8. doi:10.1367/1539-4409(2004)004<0124:TACDMA>2.0.CO;2
- 46 Hadley L, Marshall P, Black D. Pairing trainee managers and doctors: an initiative to facilitate joint working for better patient care. *Br J Hosp Med (Lond)* 2014;75:103–5.
- 47 Revere L, Robinson A, Schroth L, *et al.* Preparing academic medical department physicians to successfully lead. *Leadersh Heal Serv* 2015;28:317–31. doi:10.1108/LHS-03-2014-0023



- 48 Osborn LM, DeWitt T. The HRSA-APA Faculty Development Scholars Program: Executive Leadership Track. *Ambul Pediatr* 2004;4:98–102. doi:10.1367/1539-4409(2004)004<0098:THFDSP>2.0.CO;2
- 49 Wichman CL, Netzel PJ, Menaker R. Preparing psychiatric residents for the ‘real world’: A practice management curriculum. *Acad Psychiatry* 2009;33:131–4. doi:10.1176/appi.ap.33.2.131
- 50 Monaghan H, Swenson C, Kerins J, *et al.* Bridging the gap: using ‘Paired Learning’ to improve clinician/management understanding. *BMJ Lead* 2018;2:80–2. doi:10.1136/leader-2017-000064
- 51 Voogt JJ, van Rensen ELJ, van der Schaaf MF, *et al.* Building bridges: engaging medical residents in quality improvement and medical leadership. *Int J Qual Heal care J Int Soc Qual Heal Care* 2016;28:665–74. doi:https://dx.doi.org/10.1093/intqhc/mzw091
- 52 Heitkamp DE, Kerridge WD, Ballenger ZE, *et al.* A Leadership Development Program for Radiology Residents. *J Am Coll Radiol* 2017;14:1468–70. doi:10.1016/j.jacr.2017.05.005
- 53 Pearson A, Ryan C, MacVicar R. Preliminary programme evaluation of the Scottish Clinical Leadership Fellowship. *BMJ Lead* 2018;2:40–2. doi:10.1136/leader-2017-000038
- 54 Crites GE, Schuster RJ. A preliminary report of an educational intervention in practice management. *BMC Med Educ* 2004;4:15. doi:10.1186/1472-6920-4-15
- 55 Dickey C, Dismukes R, Topor D. Creating opportunities for organizational leadership (cool): Creating a culture and curriculum that fosters psychiatric leadership development and quality improvement. *Acad Psychiatry* 2014;38:383–7. doi:10.1007/s40596-014-0082-2
- 56 Foster T, Regan-Smith M, Murray C, *et al.* Residency education, preventive medicine, and population health care improvement: The Dartmouth-Hitchcock leadership preventive medicine approach. *Acad. Med.* 2008;83:390–8. doi:10.1097/ACM.0b013e3181667da9
- 57 Freeman AM, Nelson R, Sinha SS. The Essential Role of Leadership Development. *J. Am. Coll. Cardiol.* 2018;72:2272–5. doi:10.1016/j.jacc.2018.09.029
- 58 Saravo B, Netzel J, Kiesewetter J. The need for strong clinical leaders - Transformational and transactional leadership as a framework for resident leadership training. *PLoS One* 2017;12:e0183019. doi:https://dx.doi.org/10.1371/journal.pone.0183019
- 59 Schulz K, Puscas L, Tucci D. Surgical Training and Education in Promoting Professionalism: a comparative assessment of virtue-based leadership development in otolaryngology-head. *Med Educ ...* 2013;18:22440. doi:https://dx.doi.org/10.3402/meo.v18i0.22440
- 60 Stoller JK, Berkowitz E, Bailin PL. Physician management and leadership education at the cleveland clinic foundation: Program impact and experience over 14 years. *J Med Pract Manag* 2007;22:237–42.
- 61 Wulfert C-H, Hoitz J, Senger U. Initial Results of the Master’s Degree Programme in ‘Leadership in Medicine’ - Impact on hospital-based follow-on training of doctors. *GMS J Med Educ* 2017;34:Doc52. doi:https://dx.doi.org/10.3205/zma001129
- 62 Blumenthal DM, Bernard K, Fraser TN, *et al.* Implementing a pilot leadership course for internal medicine residents: Design considerations, participant impressions, and lessons learned. *BMC Med Educ* 2014;14:257. doi:10.1186/s12909-014-0257-2
- 63 Sanfey H, Harris I, Pollart S, *et al.* Evaluation of the University of Virginia Leadership in Academic Medicine Program. *Teach Learn Med* 2011;23:347–58. doi:10.1080/10401334.2011.611773
- 64 Edler A, Adamshick M, Fanning R, *et al.* Leadership lessons from military education for postgraduate medical curricular improvement.



- Clin Teach* 2010;7:26–31. doi:10.1111/j.1743-498X.2009.00336.x
- 65 Richman RC, Morahan PS, Cohen DW, *et al.* Advancing women and closing the leadership gap: The executive leadership in academic medicine (ELAM) program experience. *J Women's Heal Gender-Based Med* 2001;10:271–7. doi:10.1089/152460901300140022
- 66 Farver CF, Smalling S, Stoller JK, *et al.* Developing leadership competencies among medical trainees: Five-year experience at the Cleveland Clinic with a chief residents' training course. *Australas Psychiatry* 2016;24:499–505. doi:10.1177/1039856216632396
- 67 Gregg SC, Heffernan DS, Connolly MD, *et al.* Teaching leadership in trauma resuscitation: Immediate feedback from a real-time, competency-based evaluation tool shows long-term improvement in resident performance. *J Trauma Acute Care Surg* 2016;81:729–34. doi:https://dx.doi.org/10.1097/TA.0000000000001186
- 68 Hill DAMD, Jimenez J-C, Cohn SM, *et al.* How To Be a Leader: A Course for Residents. *Cureus* 2018;10:e3067. doi:https://dx.doi.org/10.7759/cureus.3067
- 69 Pugno PA, Dornfest FD, Kahn NB, *et al.* The National Institute for Program Director Development: a school for program directors. *J Am Board Fam Pract* 2002;15:209–13.
- 70 Denney M, Johnstone A. Can general practice trainees engage with leadership activities during their GP training placements? - An evaluation of an intervention in South East Scotland. *Educ Prim Care* 2019;30:102–9. doi:10.1080/14739879.2019.1566782
- 71 McAlearney AS, Fisher D, Heiser K, *et al.* Developing effective physician leaders: changing cultures and transforming organizations. *Hosp Top* 2005;83:11–8.
- 72 Shah P, Cross V, Sii F. Sailing a safe ship: Improving patient safety by enhancing the leadership skills of new consultant specialist surgeons. *J Contin Educ Health Prof* 2013;33:190–200. doi:10.1002/chp.21184
- 73 Clapp JT, Gordon EKBB, Baranov DY, *et al.* Encouraging Reflexivity in a Residency Leadership Development Program: Expanding Outside the Competency Approach. *Acad Med* 2018;93:210–3. doi:10.1097/ACM.0000000000001915
- 74 Pettit JE, Dahdaleh NS, Albert GW, *et al.* Neurosurgery resident leadership development: An innovative approach. *Neurosurgery* 2011;68:546–50. doi:10.1227/NEU.0b013e318201c2ac
- 75 Laura Donnelly. Jeremy Hunt: Doctors and nurses should be put in charge of hospitals. *Telegraph*. 2016.
- 76 Gruver W, Spahr RC. Imparting Wisdom to Evolving Leaders. *Physician Exec* 2006;32:24–9.
- 77 Babitch LA. Teaching practice management skills to pediatric residents. *Clin Pediatr (Phila)* 2006;45:846–9. doi:10.1177/0009922806294216
- 78 Gulati K, Singh AR, Kumar S, *et al.* Impact of a leadership development programme for physicians in India. doi:10.1108/LHS-05-2019-0027
- 79 Stoller JK, Rose M, Lee R, *et al.* Teambuilding and leadership training in an internal medicine residency training program: Experience with a one-day retreat. *J Gen Intern Med* 2004;19:692–7. doi:10.1111/j.1525-1497.2004.30247.x
- 80 Edmonstone J. Evaluating clinical leadership: A case study. *Leadersh Heal Serv* 2009;22:210–24. doi:10.1108/17511870910978132
- 81 Stergiopoulos V, Maggi J, Sockalingam S. Teaching the physician-manager role to psychiatric residents: development and implementation of a pilot curriculum. *Acad Psychiatry* 2009;33:125–30. doi:10.1176/appi.ap.33.2.125

- 82 Berkenbosch L, Muijtjens AMM, Zimmermann LJI, *et al.* A pilot study of a practice management training module for medical residents. *BMC Med Educ* 2014;14:107. doi:<https://dx.doi.org/10.1186/1472-6920-14-107>
- 83 Block AA, Singh J, Kanaris AM, *et al.* Equipping our front-line managers: a national program for the Professional Development of Registrars. *Med J Aust* 2007;186. doi:10.5694/j.1326-5377.2007.tb00961.x
- 84 Donaghy G, McKeever K, Flanagan C, *et al.* Helping doctors in training to STEP-UP: A leadership and quality improvement programme in the belfast health and social care trust. *Ulster Med J* 2018;87:112–6.
- 85 Frugé E, Mahoney DH, Poplack DG, *et al.* Leadership: ‘They never taught me this in medical school’. *J. Pediatr. Hematol. Oncol.* 2010;32:304–8. doi:10.1097/MPH.0b013e3181cf4594
- 86 Hunt MA, Heilman CB, Shutran M, *et al.* Commentary: An introduction to leadership self-assessment at the society of neurological surgeons post-graduate year 1 boot camp: Observations and commentary. United States: 2017. doi:10.1093/neuros/nyw093
- 87 Murdock J, Brammer C. A successful model of leadership development for community practice physicians. *Physician Exec* 2011;37:52-54,56.
- 88 Thakur A, O’Leary B, Cowie W, *et al.* The Development and Validation of a Workplace-Based Leadership Program for Senior Residents in Psychiatry. *Acad Psychiatry* 2018;43:123–7. doi:<https://dx.doi.org/10.1007/s40596-018-0982-7>
- 89 Patterson D, Godden A, Rughani A, *et al.* A leadership programme in GP training: an action learning approach. *Educ Prim Care* 2013;24:65–8. doi:10.1080/14739879.2013.11493457
- 90 Maza Y, Shechter E, Pur Eizenberg N, *et al.* Physician empowerment programme; a unique workshop for physician-managers of community clinics. *BMC Med Educ* 2016;16:269. doi:10.1186/s12909-016-0786-y
- 91 Steinert Y, Nasmith L, Daigle N. Executive skills for medical faculty: A workshop description and evaluation. *Med Teach* 2003;25:666–8. doi:10.1080/0142159032000150485
- 92 Satiani B, Sena J, Ruberg R, *et al.* Talent management and physician leadership training is essential for preparing tomorrow’s physician leaders. *J Vasc Surg* 2014;59:542–6. doi:10.1016/j.jvs.2013.10.074
- 93 Lee MT, Tse AM, Naguwa GS. Building leadership skills in paediatric residents. *Med Educ* 2004;38:559–60. doi:10.1111/j.1365-2929.2004.01867.x
- 94 Steiner JL, Mazure C, Siggins LD, *et al.* Teaching psychiatric residents about women and leadership. 2004. doi:10.1176/appi.ap.28.3.243
- 95 Awad SS, Hayley B, Fagan SP, *et al.* The impact of a novel resident leadership training curriculum. *Am J Surg* 2004;188:481–4. doi:10.1016/j.amjsurg.2004.07.024
- 96 Bayard M, Peeples CR, Holt J, *et al.* An interactive approach to teaching practice management to family practice residents. *Fam Med* 2003;35:622–4.
- 97 Hanna WC, Mulder DS, Fried GM, *et al.* Training future surgeons for management roles: The resident-surgeon-manager conference. In: *Archives of Surgery*. 2012. 940–4. doi:10.1001/archsurg.2012.992
- 98 Patel N, Vemuri D, Frasso R, *et al.* Perceptions of Health Care Executives on Leadership Development Skills for Residents After Participating in a Longitudinal Mentorship Program. *Am J Med Qual* 2019;34:80–6. doi:10.1177/1062860618786798

- 99 Stefan MS, Belforti RK, Langlois G, *et al.* A Simulation-Based Program to Train Medical Residents to Lead and Perform Advanced Cardiovascular Life Support. *Hosp Pract* 2011;39:63–9. doi:10.3810/hp.2011.10.923
- 100 Gagliano NJ, Ferris T, Colton D, *et al.* A physician leadership development program at an academic medical center. *Qual Manag Health Care* 2010;19:231–8. doi:10.1097/QMH.0b013e3181eb13ab
- 101 Gurrera RJ, Dismukes R, Edwards M, *et al.* Preparing residents in training to become health-care leaders: A pilot project. *Acad Psychiatry* 2014;38:701–5. doi:10.1007/s40596-014-0162-3
- 102 Bhatia K, Morris CA, Wright SC, *et al.* Leadership Training for Residents: a Novel Approach. *Physician Leadersh J* 2015;2:76–80.
- 103 Hadley L, Black D, Welch J, *et al.* Encouraging formative assessments of leadership for foundation doctors. *Clin Teach* 2015;12:231–5. doi:https://dx.doi.org/10.1111/tct.12289
- 104 Kasuya R, Nip I, Anderson MB. A retreat on leadership skills for residents. *Acad Med* 2001;76:554. doi:10.1097/00001888-200105000-00099
- 105 Ninan D, Patel D. Career and Leadership Education in Anesthesia Residency Training. *Cureus* 2018;10:e2546. doi:https://dx.doi.org/10.7759/cureus.2546
- 106 Schwartz BJ, Blackmore MA, Weiss A. The Tarrytown Chief Residents Leadership Conference: A Long-Term Follow-up. *Acad Psychiatry* 2014;38:15–8. doi:10.1007/s40596-013-0016-4
- 107 Ennis-Cole DL, Cullum PM, Iwundu C. Physicians as Operational Leaders: Cost, Curriculum, Technology, and Organizational Challenges. *TechTrends* 2018;62:239–49. doi:10.1007/s11528-018-0273-x
- 108 Steinhardt L. Workshop for New Leaders: Innovative Midwifery Teaching for Obstetrics and Gynecology Residents. *J Midwifery Women's Heal* 2015;60:313–7. doi:10.1111/jmwh.12292
- 109 Torbeck L, Rozycki G, Dunnington G. Leaders Growing Leaders: Designing a Tier-Based Leadership Program for Surgeons. *J Surg Educ* Published Online First: 2018. doi:https://dx.doi.org/10.1016/j.jsurg.2017.12.009
- 110 Vimr M, Dickens P. Building Physician Capacity for Transformational Leadership—Revisited. *Healthc Manag Forum* 2013;26:16–9. doi:https://doi.org/10.1016/j.hcmf.2013.01.003
- 111 Bircher J. Extending GP training and the development of leadership skills: The experience of the North Western Deanery pilot. *Educ Prim Care* 2013;24:57–60. doi:10.1080/14739879.2013.11493457
- 112 Kochar MS, Robertson RG, Mone MA. A faculty leadership development program at the Medical College of Wisconsin. *Wis. Med. J.* 2003;102:24–8.
- 113 Biese K, Leacock BW, Osmond CR, *et al.* Engaging Senior Residents as Leaders: A Novel Structure for Multiple Chief Roles. *J Grad Med Educ* 2011;3:236–8. doi:10.4300/jgme-d-10-00045.1
- 114 Cherry RA, Davis DC, Thorndyke L. Transforming culture through physician leadership development. *Physician Exec* 2010;36:38–44.
- 115 Johnson JM, Stern TA. Teaching Residents About Emotional Intelligence and Its Impact on Leadership. *Acad Psychiatry* 2014;38:510–3. doi:10.1007/s40596-014-0048-4
- 116 O'donnell L, Bennett GL. Case management takes lead role in educating medical residents. *Prof Case Manag* 2011;16:253–5.

doi:10.1097/ncm.0b013e31821b0785

- 117 Ringdahl EN, Tarwater KD, Lindbloom EJ. A Longitudinal Curriculum to Address the Gender Gap in Physician Leadership. *J Grad Med Educ* 2014;6:361–2. doi:10.4300/JGME-D-14-00081.1

| <b>MERSQI Component</b>                                      | <b>Classification</b>                               | <b>All studies (117)</b> | <b>MERSQI&gt;12 (16)</b> | <b>JBI&gt;6 (14)</b> |
|--------------------------------------------------------------|-----------------------------------------------------|--------------------------|--------------------------|----------------------|
| <b>Study Design</b>                                          | Single Group Cross-Sectional or Post-programme only | 54 (46%)                 | 0 (0%)                   | 8 (57%)              |
|                                                              | Single Group Pre and Post Programme                 | 54 (46%)                 | 9 (56%)                  | 5 (36%)              |
|                                                              | Non-Randomised Two Group                            | 8 (7%)                   | 6 (38%)                  | 0 (0%)               |
|                                                              | Randomised Controlled Trial                         | 1 (1%)                   | 1 (6%)                   | 1 (7%)               |
| <b>Institution #</b>                                         | Single                                              | 81 (69%)                 | 10 (63%)                 | 9 (64%)              |
|                                                              | Double                                              | 1 (1%)                   | 1 (6%)                   | 0 (0%)               |
|                                                              | Multi                                               | 35 (30%)                 | 5 (31%)                  | 5 (36%)              |
| <b>Response Rate</b>                                         | <50% or NR                                          | 44 (38%)                 | 3 (19%)                  | 1 (7%)               |
|                                                              | 50-75%                                              | 23 (20%)                 | 3 (19%)                  | 6 (43%)              |
|                                                              | >75%                                                | 48 (41%)                 | 9 (56%)                  | 7 (50%)              |
| <b>Type of Data</b>                                          | Self-reported                                       | 70 (60%)                 | 2 (13%)                  | 9 (64%)              |
|                                                              | Observed                                            | 47 (40%)                 | 14 (88%)                 | 5 (36%)              |
| <b>Questionnaire Construct Validity (Internal Structure)</b> | Reported                                            | 9 (8%)                   | 7 (44%)                  | 2 (14%)              |
|                                                              | Not Reported                                        | 108 (92%)                | 9 (56%)                  | 12 (86%)             |
| <b>Questionnaire Content Validity (Content)</b>              | Reported                                            | 45 (38%)                 | 14 (88%)                 | 5 (36%)              |
|                                                              | Not Reported                                        | 72 (62%)                 | 2 (13%)                  | 9 (64%)              |
| <b>Relationships to Other Variables</b>                      | Reported                                            | 8 (7%)                   | 5 (31%)                  | 3 (21%)              |
|                                                              | Not Reported                                        | 108 (92%)                | 11 (69%)                 | 11 (79%)             |
| <b>Data Analysis Comprehensiveness (Appropriateness)</b>     | Comprehensive                                       | 23 (20%)                 | 14 (88%)                 | 6 (43%)              |
|                                                              | Less Comprehensive                                  | 94 (80%)                 | 2 (13%)                  | 8 (57%)              |
| <b>Data Analysis Complexity</b>                              | Descriptive only                                    | 102 (87%)                | 7 (44%)                  | 11 (79%)             |
|                                                              | Beyond Descriptive                                  | 15 (13%)                 | 9 (56%)                  | 3 (21%)              |
| <b>Outcomes (Kirkpatrick Level)</b>                          | Level 1                                             | 80 (68%)                 | 8 (50%)                  | 14 (100%)            |
|                                                              | Level 2a                                            | 70 (60%)                 | 7 (44%)                  | 13 (93%)             |
|                                                              | Level 2b                                            | 79 (68%)                 | 11 (69%)                 | 11 (79%)             |
|                                                              | Level 3a                                            | 51 (44%)                 | 7 (44%)                  | 10 (71%)             |
|                                                              | Level 3b                                            | 54 (46%)                 | 14 (88%)                 | 7 (50%)              |
|                                                              | Level 4a                                            | 9 (8%)                   | 1 (6%)                   | 2 (14%)              |
|                                                              | Level 4b                                            | 26 (22%)                 | 7 (44%)                  | 4 (29%)              |

Supplementary Table 2: Study characteristics organised by MERSQI heading. Brackets in headings refer to original MERSQI items where headings have been adapted for clarity.

| <b>JBI Component</b>              | <b>Description of component</b>                                                                      | High-reliability studies<br>(n=14) | Mixed-Methods Studies<br>(n=53) | Qualitative Studies<br>(n=10) |
|-----------------------------------|------------------------------------------------------------------------------------------------------|------------------------------------|---------------------------------|-------------------------------|
| <b>Philosophical Perspective</b>  | <i>Congruity between the stated philosophical perspective and the research methodology</i>           | 0 (0%)                             | 0 (0%)                          | 0 (0%)                        |
| <b>Objectives</b>                 | <i>Congruity between the research methodology and the research question or objectives</i>            | 39 (63%)                           | 33 (62%)                        | 6 (60%)                       |
| <b>Methods</b>                    | <i>Congruity between the research methodology and the methods used to collect data</i>               | 38 (61%)                           | 32 (60%)                        | 6 (60%)                       |
| <b>Analysis</b>                   | <i>Congruity between the research methodology and the representation and analysis of data</i>        | 18 (29%)                           | 15 (28%)                        | 3 (30%)                       |
| <b>Interpretation</b>             | <i>Congruity between the research methodology and the interpretation of results</i>                  | 17 (27%)                           | 13 (25%)                        | 4 (40%)                       |
| <b>Researcher Location</b>        | <i>Statement locating the researcher culturally or theoretically</i>                                 | 10 (16%)                           | 8 (15%)                         | 2 (20%)                       |
| <b>Researcher Influence</b>       | <i>Influence of the researcher on the research addressed</i>                                         | 13 (21%)                           | 12 (23%)                        | 1 (10%)                       |
| <b>Participant Representation</b> | <i>Participants and their voices adequately represented</i>                                          | 21 (34%)                           | 16 (30%)                        | 5 (50%)                       |
| <b>Ethics</b>                     | <i>Evidence of ethical approval by an appropriate body</i>                                           | 26 (42%)                           | 23 (43%)                        | 3 (30%)                       |
| <b>Conclusions Supported</b>      | <i>Conclusions drawn in the research report flow from the analysis or interpretation of the data</i> | 20 (32%)                           | 16 (30%)                        | 4 (40%)                       |

Supplementary Table 3: Proportion of studies which met Joanna Briggs Institute (JBI) Critical Appraisal Items for Qualitative Studies. Descriptions are adapted from the JBI tool. Higher Reliability Studies scored 6 or more on the JBI tool.

| <input type="checkbox"/> | # ▲ | Searches                                                                                                                                      | Results | Type     | Actions                                                | Annotations |          |
|--------------------------|-----|-----------------------------------------------------------------------------------------------------------------------------------------------|---------|----------|--------------------------------------------------------|-------------|----------|
| <input type="checkbox"/> | 1   | PHYSICIANS/                                                                                                                                   | 87338   | Advanced | <a href="#">Display Results</a>   <a href="#">More</a> |             | Contract |
| <input type="checkbox"/> | 2   | PHYSICIAN EXECUTIVES/                                                                                                                         | 4211    | Advanced | <a href="#">Display Results</a>   <a href="#">More</a> |             |          |
| <input type="checkbox"/> | 3   | CONSULTANTS/                                                                                                                                  | 6648    | Advanced | <a href="#">Display Results</a>   <a href="#">More</a> |             |          |
| <input type="checkbox"/> | 4   | INTERNSHIP/                                                                                                                                   | 48084   | Advanced | <a href="#">Display Results</a>   <a href="#">More</a> |             |          |
| <input type="checkbox"/> | 5   | RESIDENCY/                                                                                                                                    | 48084   | Advanced | <a href="#">Display Results</a>   <a href="#">More</a> |             |          |
| <input type="checkbox"/> | 6   | MEDICAL STAFF/                                                                                                                                | 2559    | Advanced | <a href="#">Display Results</a>   <a href="#">More</a> |             |          |
| <input type="checkbox"/> | 7   | (physician* or surgeon* or doctor* or intern or interns or residen* or registrar* or consultant* or "house officer*" or "medical staff*").ti. | 230256  | Advanced | <a href="#">Display Results</a>   <a href="#">More</a> |             |          |
| <input type="checkbox"/> | 8   | 1 or 2 or 3 or 4 or 5 or 6 or 7                                                                                                               | 304607  | Advanced | <a href="#">Display Results</a>   <a href="#">More</a> |             |          |
| <input type="checkbox"/> | 9   | LEADERSHIP/                                                                                                                                   | 40117   | Advanced | <a href="#">Display Results</a>   <a href="#">More</a> |             |          |
| <input type="checkbox"/> | 10  | PRACTICE MANAGEMENT/                                                                                                                          | 1344    | Advanced | <a href="#">Display Results</a>   <a href="#">More</a> |             |          |
| <input type="checkbox"/> | 11  | "leader*".ti.                                                                                                                                 | 21361   | Advanced | <a href="#">Display Results</a>   <a href="#">More</a> |             |          |
| <input type="checkbox"/> | 12  | (practice and manag*).ti.                                                                                                                     | 9878    | Advanced | <a href="#">Display Results</a>   <a href="#">More</a> |             |          |
| <input type="checkbox"/> | 13  | 9 or 10 or 11 or 12                                                                                                                           | 58933   | Advanced | <a href="#">Display Results</a>   <a href="#">More</a> |             |          |
| <input type="checkbox"/> | 14  | PROGRAM EVALUATION/                                                                                                                           | 61451   | Advanced | <a href="#">Display Results</a>   <a href="#">More</a> |             |          |
| <input type="checkbox"/> | 15  | PROGRAM DEVELOPMENT/                                                                                                                          | 28428   | Advanced | <a href="#">Display Results</a>   <a href="#">More</a> |             |          |
| <input type="checkbox"/> | 16  | CURRICULUM/                                                                                                                                   | 73527   | Advanced | <a href="#">Display Results</a>   <a href="#">More</a> |             |          |
| <input type="checkbox"/> | 17  | EDUCATION.MEDICAL.CONTINUING/                                                                                                                 | 24544   | Advanced | <a href="#">Display Results</a>   <a href="#">More</a> |             |          |
| <input type="checkbox"/> | 18  | EDUCATION.MEDICAL.GRADUATE/                                                                                                                   | 28493   | Advanced | <a href="#">Display Results</a>   <a href="#">More</a> |             |          |
| <input type="checkbox"/> | 19  | (teach* or train* or educat* or course* or program* or pathway* or curricul*).ti.                                                             | 783506  | Advanced | <a href="#">Display Results</a>   <a href="#">More</a> |             |          |
| <input type="checkbox"/> | 20  | 14 or 15 or 16 or 17 or 18 or 19                                                                                                              | 873227  | Advanced | <a href="#">Display Results</a>   <a href="#">More</a> |             |          |
| <input type="checkbox"/> | 21  | 8 and 13 and 20                                                                                                                               | 1068    | Advanced | <a href="#">Display Results</a>   <a href="#">More</a> |             |          |
| <input type="checkbox"/> | 22  | limit 21 to yr="2013 -Current"                                                                                                                | 461     | Advanced | <a href="#">Display Results</a>   <a href="#">More</a> |             |          |
| <input type="checkbox"/> | 23  | GENERAL PRACTITIONERS/                                                                                                                        | 7485    | Advanced | <a href="#">Display Results</a>   <a href="#">More</a> |             |          |
| <input type="checkbox"/> | 24  | FAMILY PHYSICIANS/                                                                                                                            | 16222   | Advanced | <a href="#">Display Results</a>   <a href="#">More</a> |             |          |
| <input type="checkbox"/> | 25  | MEDICAL STAFF,HOSPITAL/                                                                                                                       | 22748   | Advanced | <a href="#">Display Results</a>   <a href="#">More</a> |             |          |
| <input type="checkbox"/> | 26  | (GP or GPs or "general practitioner*" or "family practitioner*").ti.                                                                          | 22053   | Advanced | <a href="#">Display Results</a>   <a href="#">More</a> |             |          |
| <input type="checkbox"/> | 27  | 23 or 24 or 25 or 26                                                                                                                          | 60255   | Advanced | <a href="#">Display Results</a>   <a href="#">More</a> |             |          |
| <input type="checkbox"/> | 28  | 13 and 20 and 27                                                                                                                              | 161     | Advanced | <a href="#">Display Results</a>   <a href="#">More</a> |             |          |
| <input type="checkbox"/> | 29  | limit 28 to yr="2013 -Current"                                                                                                                | 63      | Advanced | <a href="#">Display Results</a>   <a href="#">More</a> |             |          |
| <input type="checkbox"/> | 30  | 29 not 22                                                                                                                                     | 40      | Advanced | <a href="#">Display Results</a>   <a href="#">More</a> |             |          |

Supplementary Figure 1: Medline (OVID) Search Strategy, January 2020
